1 **Notch signaling functions in non-canonical juxtacrine manner in platelets to amplify**  
2 **thrombogenicity**

3 Susheel N. Chaurasia<sup>1</sup>, Mohammad Ekhlak<sup>1</sup>, Geeta Kushwaha<sup>1,†</sup>, Vipin Singh<sup>1</sup>, Ram L. Mallick<sup>1,‡</sup>  
4 Debabrata Dash<sup>1\*</sup>

5 <sup>1</sup>Center for Advanced Research on Platelet Signaling and Thrombosis Biology, Department of  
6 Biochemistry, Institute of Medical Sciences, Banaras Hindu University; Varanasi-221005, Uttar  
7 Pradesh, India

8 <sup>†</sup>Department of Biochemistry, Vardhman Mahavir Medical College and Safdarjung Hospital;  
9 New Delhi-110029, India

10 <sup>‡</sup>Department of Biochemistry, Birat Medical College and Teaching Hospital; Biratnagar-56613,  
11 Nepal

12 \*To whom correspondence should be addressed: Prof. Debabrata Dash, Department of  
13 Biochemistry, Institute of Medical Sciences, Banaras Hindu University, Varanasi-221005, India,  
14 Tel: 0091-9336910665; Email: ddash.biochem@gmail.com

15

16

17

18

19

20

21

22 **ABSTRACT**

23 **Background**

24 Notch signaling is an evolutionarily conserved pathway that dictates cell fate decisions in  
25 mammalian cells including megakaryocytes. Existence of functional Notch signaling in enucleate  
26 platelets that are generated as cytoplasmic buds from megakaryocytes still remains elusive.

27 **Methods**

28 Platelets were isolated from human blood by differential centrifugation under informed  
29 consent. Expression of transcripts as well as peptides of Notch1 and DLL-4 in platelets was  
30 studied by employing RT-qPCR, Western analysis and flow cytometry. Platelet activation  
31 responses that include aggregation, secretion of granule contents and platelet-leucocyte  
32 interaction were analyzed by Born's aggregometry, flow cytometry, Western analysis and lumi-  
33 aggregometry. Shedding of extracellular vesicles from platelets was documented with  
34 Nanoparticle Tracking Analyzer. Platelet adhesion and thrombus growth on immobilized matrix  
35 was quantified by employing microfluidics platform. Intracellular free calcium in Fura-2-loaded  
36 platelets was monitored from ratiometric fluorescence spectrophotometry. Coagulation  
37 parameters in whole blood were studied by thromboelastography. Ferric chloride-induced  
38 mesenteric arteriolar thrombosis in murine model was imaged by intravital microscopy.

39 **Results**

40 Here we demonstrate significant expression of Notch1 and its ligand, the Delta-like ligand (DLL)-  
41 4, as well as their respective transcripts, in human platelets. Synthesis and surface translocation

42 of Notch1 and DLL-4 were upregulated when cells were challenged with physiological agonists  
43 like thrombin. DLL-4, in turn, instigated neighbouring platelets to switch to 'activated'  
44 phenotype, associated with cleavage of Notch receptor and generation of its intracellular  
45 domain (NICD). DLL-4-mediated pro-thrombotic attributes were averted by pharmacological  
46 inhibition of  $\gamma$ -secretase and phosphatidylinositol 3-kinase. Inhibition of Notch signaling, too,  
47 restrained agonist-induced platelet activation, and significantly impaired arterial thrombosis in  
48 mice, suggestive of synergism between thrombin- and DLL-4-mediated pathways. Strikingly,  
49 prevention of DLL-4-Notch1 interaction by a blocking antibody abolished platelet aggregation  
50 and extracellular vesicle shedding induced by thrombin.

## 51 **Conclusions**

52 Our study presents compelling evidence in support of non-canonical Notch signaling that  
53 propagates in juxtacrine manner within platelet aggregates and synergizes with physiological  
54 agonists to generate occlusive intramural thrombi. Thus, targeting Notch signaling can be  
55 investigated as a potential anti-platelet/anti-thrombotic therapeutic approach.

## 56 **Funding**

57 This research was supported by J. C. Bose National Fellowship (JCB/2017/000029) and  
58 grants received by D. Dash from the Indian Council of Medical Research (ICMR) under CAR  
59 (71/4/2018-BMS/CAR), Department of Biotechnology (DBT) (BT/PR-20645/BRB/10/1541/2016)  
60 and Science and Engineering Research Board (SERB) (EMR/2015/000583), Government of India.  
61 S.N. Chaurasia is a recipient of financial assistance from the ICMR. M. Ekhlak is a recipient of

62 CSIR-SRF and V. Singh is a recipient of UGC-SRF. D. Dash acknowledges assistance from the  
63 Humboldt Foundation, Germany. Funders have no role in the design, analysis and reporting of  
64 the study.

## 65 **INTRODUCTION**

66 Notch signaling, one of the evolutionarily conserved pathways in mammals, is a central  
67 regulator of cell fate determinations through cell-to-cell interactions (Kopan and Ilagan, 2009,  
68 Guruharsha et al., 2012) that critically influences cell proliferation, differentiation and apoptosis  
69 (Miele and Osborne, 1999). Signaling is induced through binding of five independent ligands,  
70 Delta-like ligands (DLL)-1, 3, 4 and Jagged-1 and -2 (Kopan and Ilagan, 2009), to four isoforms of  
71 cognate Notch receptors, Notch1 to Notch4, on surface of adjacent cells. Binding incites  
72 sequential  $\alpha$ - and  $\gamma$ -secretase-mediated proteolytic events releasing the intracellular domain of  
73 Notch receptor (NICD) that initiates downstream effects of Notch activation (Maillard et al.,  
74 2003, Blanpain et al., 2006, Qiao and Wong, 2009, Andersson et al., 2011).

75 Platelets are circulating blood cells having central role in hemostasis and pathological  
76 thrombus formation that can lead to serious vaso-occlusive pathologies like myocardial  
77 infarction and ischemic stroke. Despite lack of genomic DNA platelets intriguingly express  
78 several transcription factors (Spinelli et al., 2010) and developmental morphogens like Wnt  
79 (Kumari and Dash, 2013, Steele et al., 2009) and Sonic Hedgehog (Kumari et al., 2014), whose  
80 non-canonical non-genomic roles in platelet biology and thrombogenesis remain poorly  
81 characterized. Notch signaling has been linked to differentiation of megakaryocytes (Sugimoto  
82 et al., 2006, Mercher et al., 2008), the platelet precursor cells in bone marrow, though there

83 also have been reports to the contrary (Dorsch et al., 2002, Poirault-Chassac et al., 2010). Here,  
84 for the first time, we demonstrate abundant expression of Notch1 and DLL-4, as well as their  
85 respective transcripts in human platelets. When platelets were challenged with thrombin, a  
86 potent physiological agonist, synthesis and surface translocation of Notch1 and DLL-4 were  
87 significantly augmented. Interestingly, DLL-4, in turn, instigated activation of human platelets,  
88 as evidenced from binding of PAC-1 and fibrinogen to surface integrins  $\alpha_{IIb}\beta_3$ , P-selectin  
89 externalization, release of adenine nucleotides, shedding of extracellular vesicles (EVs),  
90 amplified tyrosine phosphoproteome and rise in intracellular calcium, associated with  
91 generation of NICD. Attenuation of  $\gamma$ -secretase significantly abrogated platelet activation  
92 responses triggered either by DLL-4 or thrombin. Inhibition of  $\gamma$ -secretase, too, significantly  
93 impaired arterial thrombosis in mice and platelet thrombus generation *ex vivo*. Furthermore,  
94 preclusion of DLL-4-Notch1 interaction by pre-incubation with a blocking antibody prohibited  
95 thrombin-mediated platelet aggregation and shedding of EVs, which underscores a critical role  
96 of Notch signaling in inducing human platelet activation in synergism with physiological  
97 agonists in a juxtacrine manner.

## 98 **RESULTS**

### 99 **Notch1 and DLL-4 are abundantly expressed in human platelets**

100 Although enucleate, platelets inherit a limited transcriptome from precursor  
101 megakaryocytes (Freedman, 2011, McRedmond et al., 2004). Notch1 is a transmembrane  
102 protein present on cell surfaces and is part of a highly conserved Notch signaling pathway (van  
103 Tetering et al., 2011). We searched for the expression of transcripts of Notch isoforms and its

104 ligands in platelets by RT-qPCR. The Cq values for housekeeping genes (GAPDH and  $\beta$ -actin)  
105 were determined as 21 and 23, respectively, whereas that for Notch1 was 27 (Figure 1-figure  
106 supplement 1, A and B), which was reflective of abundant expression of Notch1 mRNA in  
107 human platelets. Contrasting this, Notch isoforms 2, 3 and 4 had Cq values greater than 33  
108 (Figure 1-figure supplement 1, A and B). Keeping with above, there was notable existence of  
109 Notch1 peptide in human platelets, whose level significantly increased upon stimulation with  
110 thrombin (1 U/ml), a potent physiological agonist (Fig. 1, A and B). Pre-treatment of platelets  
111 with puromycin (10 mM) significantly deterred synthesis of this peptide (Fig. 1, A and B). We  
112 also observed considerable expression of Notch1 on platelet surface membrane, whose level  
113 enhanced significantly (by 65.71%) upon thrombin-stimulation (Fig. 1, C and D).

114 The Cq of DLL-4, Jagged-1 and -2 were found to be 26, 31 and 30, respectively while  
115 those for DLL isoforms-1 and -3 were higher than or equal to 33 (Figure 1-figure supplement 2,  
116 A and B), reflective of DLL-4 being the most abundantly expressed Notch ligand transcript in  
117 human platelets. Melt peak analyses were supportive of lack of formation of by-products  
118 (Figure 1-figure supplement 1C and S2C). Consistent with above, platelets were found to  
119 express DLL-4 peptide whose level increased significantly when cells were challenged with  
120 thrombin (1 U/ml) (Fig. 1, E and F). Rise in DLL-4 could be averted upon pre-incubation of  
121 platelets with puromycin (10 mM) (Fig. 1, E and F). Thrombin, too, significantly augmented  
122 surface translocation of DLL-4 by 64.31 % (Fig. 1, G and H), thus raising possibility of DLL-4-  
123 Notch1 interaction on adjacent platelet membranes. As enucleate platelets are known to have  
124 limited capacity for protein synthesis, the present observations add Notch1 and DLL-4 to the  
125 growing list of platelets transcriptome.



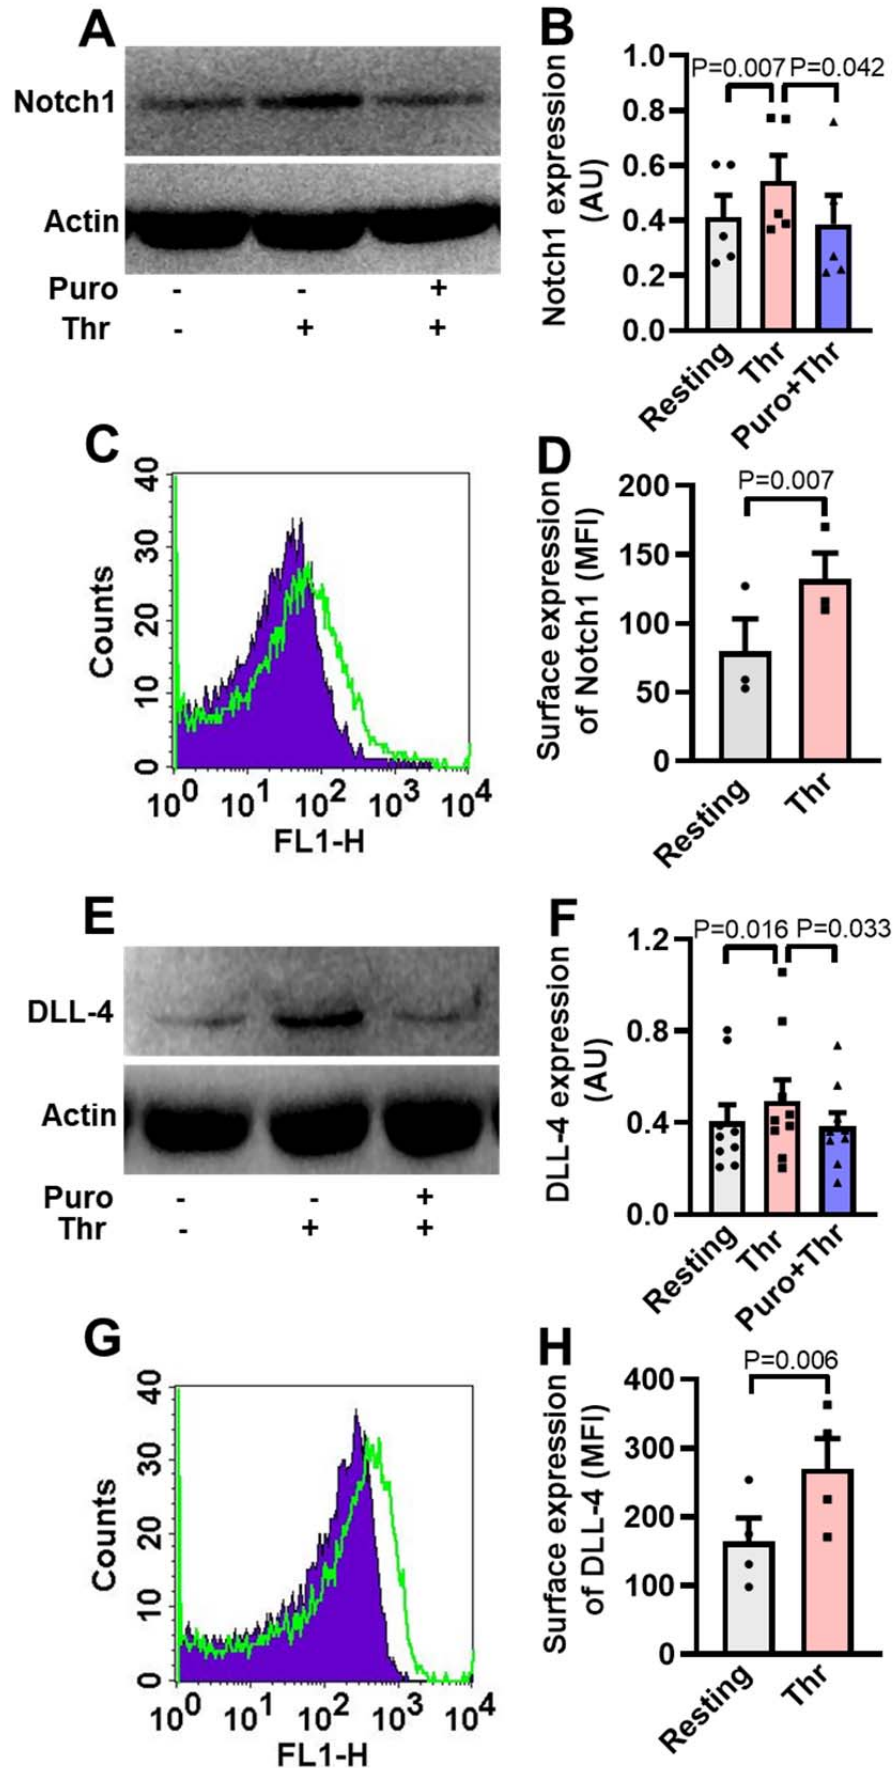



128 **Fig. 1. Human platelets express Notch1 and DLL-4.** A, immunoblot demonstrating expression of  
129 Notch1 in platelets pre-treated with or without puromycin (Puro, 10 mM), followed by  
130 stimulation with thrombin (Thr, 1U/ml, for 5 min at 37 °C). B, corresponding densitometric  
131 analysis of Notch1 normalised with  $\beta$ -actin (n=5). C, flow cytometric analysis of platelets treated  
132 with (unshaded) or without (shaded) thrombin (1 U/ml) for 5 min at 37 °C, followed by staining  
133 with anti-Notch1 antibody and Alexa Fluor 488-labelled secondary antibody. D, corresponding  
134 mean fluorescence intensity (MFI) of platelets as indicated (n=3). E, immunoblot showing  
135 synthesis of DLL-4 in thrombin-stimulated platelets. F, corresponding densitometric analysis of  
136 DLL-4 normalised with  $\beta$ -actin (n=9). G, histogram showing expression of DLL-4 on surface of  
137 human platelets pre-treated with (unshaded) or without (shaded) thrombin (1 U/ml) for 5 min  
138 at 37 °C, followed by incubation with anti-DLL-4 antibody and Alexa Fluor 488-labelled  
139 secondary antibody. H, corresponding mean fluorescence intensity of platelets as indicated  
140 (n=4). Data are presented as mean  $\pm$  SEM and are representative of at least three different  
141 experiments. Analysed by either Student's paired *t*-test (D and H) or RM one-way ANOVA with  
142 Dunnett's multiple comparisons test (B and F).

#### 143 **DLL-4 amplifies expression of Notch intracellular domain (NICD) in human platelets**

144 Interaction of Notch1 with cognate ligands leads to sequential cleavage of the  
145 transmembrane receptor and generation of NICD (Iso et al., 2003). As Notch1 is expressed in  
146 human platelets, we asked whether exposure to DLL-4 would evoke release of NICD in these  
147 cells. Remarkably, exposure of platelets with DLL-4 (15  $\mu$ g/ml) for 10 min led to significant rise  
148 (by 5.1-fold) in level of NICD (Fig. 2, A and B). As NICD generation is mediated through activity

149 of  $\gamma$ -secretase, we next investigated the contribution of this protease in DLL-4-induced NICD  
150 release in platelets. Pre-treatment of platelets with either DAPT (10  $\mu$ M) or DBZ (10  $\mu$ M),  
151 specific inhibitors of  $\gamma$ -secretase, for 10 min led to significant drop in DLL-4-induced NICD  
152 release (by 25.33 % and 23.77 %, respectively) (Fig. 2, A and B), strongly suggestive of functional  
153 DLL-4-Notch1-NICD signaling axis in human platelets.

154 Interestingly, level of NICD was reduced by 2.4, 43.4, 70.3 and 84.9 %, respectively,  
155 when platelets were stored for 1, 3, 5 and 8 h at 37 °C in presence of 1 mM calcium (Fig. 2C).  
156 However, NICD level was not considerably affected upon storage of cells at 22 °C. As calpain,  
157 the  $\text{Ca}^{2+}$ -dependent thiol protease, is known to be activated in platelets stored at 37 °C, and not  
158 at 22 °C (Wadhawan et al., 2004), we pre-incubated cells at 37 °C with either calpeptin (80  $\mu$ M)  
159 or ALLN (50  $\mu$ M), specific inhibitors of calpain, or divalent ion chelator EGTA (1 mM). Significant  
160 recovery of NICD intensity under above conditions (Fig. 2D) was consistent with NICD being a  
161 calpain substrate. In keeping with this observation, incubation of platelets with calcium  
162 ionophore A23187 (1  $\mu$ M) for 10 min at 37 °C in presence of 1 mM calcium brought about  
163 significant reduction (by 29.77 %) in the level of NICD, which was restored upon pre-treatment  
164 with either of the calpain inhibitors (Fig. 2E).

165

166

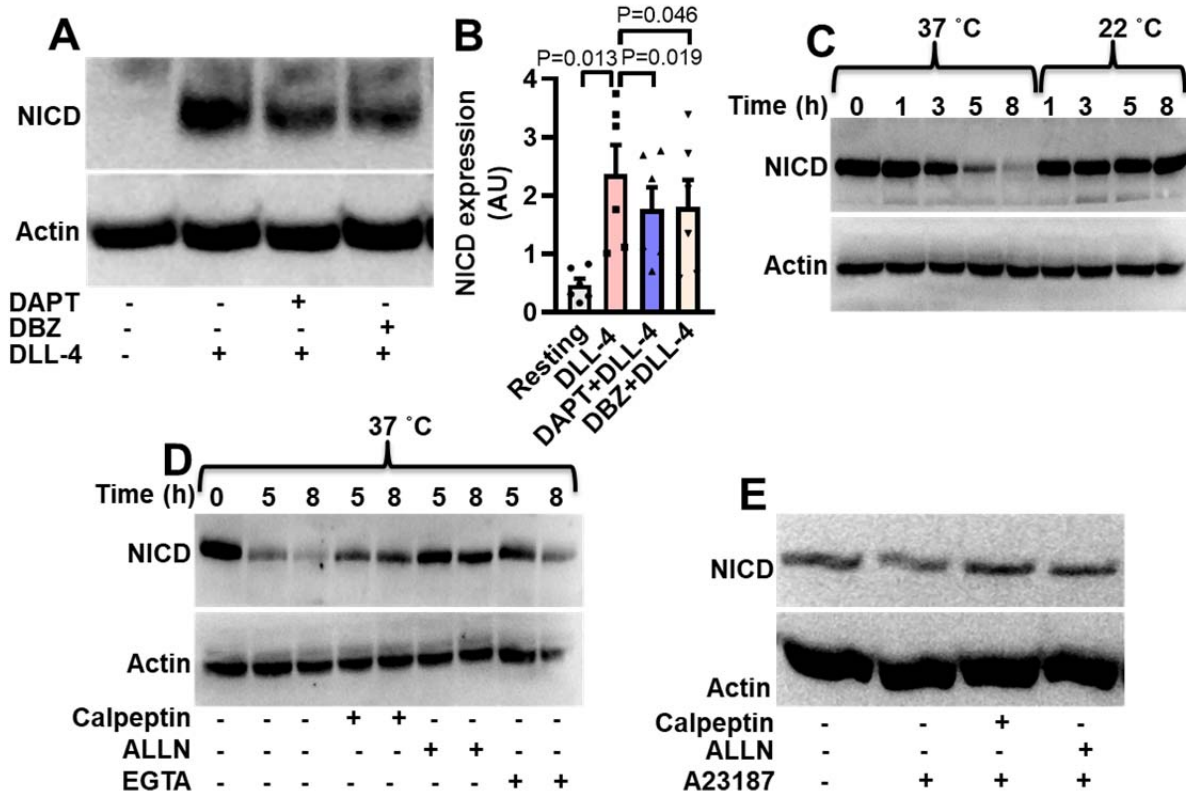

167

168 **Fig. 2. Expression of NICD in human platelets.** A, immunoblot showing expression of NICD in  
 169 DLL-4 (15 µg/ml for 10 min)-treated platelets in absence or presence of either DAPT (10 µM) or  
 170 DBZ (10 µM) or vehicle. B, corresponding densitometric analysis of NICD normalised with β-  
 171 actin (n=6). C, D and E, immunoblot of NICD expression in either stored or A23187 (1 µM)-  
 172 treated platelets under conditions as indicated. Data are represented as mean ± SEM of at least  
 173 three individual experiments. Analysed by RM one-way ANOVA with Dunnett's multiple  
 174 comparisons test (B).

175 **DLL-4 but not DLL-1 induces integrin α<sub>IIb</sub>β<sub>3</sub> activation, exocytosis of granule contents, rise in**  
 176 **intracellular calcium, extracellular vesicle shedding, platelet-leucocyte aggregate formation**  
 177 **and increase in tyrosine phosphoproteome in human platelets**

178 Hallmark of activated platelets is the conformational switch of its surface integrins  $\alpha_{IIb}\beta_3$   
179 that allows high-affinity binding of fibrinogen, associated with release of granule contents, rise  
180 in intracellular free calcium and shedding of extracellular vesicles. To study the effect of Notch  
181 ligands we pre-incubated platelets with DLL-4 (15  $\mu\text{g}/\text{ml}$  for 10 min at RT) that prompted  
182 enhanced binding of PAC-1-FITC (that recognizes the open conformation of  $\alpha_{IIb}\beta_3$ ) (Fig. 3, A and  
183 B) and fibrinogen-Alexa Fluor 488 (Figure 3-figure supplement 1) by 3.07- and 3.13- folds,  
184 respectively. DLL-1 was notably ineffective in eliciting such response. Furthermore, platelets  
185 exposed to DLL-4 were found to have significant surface expression of P-selectin as a measure  
186 of  $\alpha$  granule secretion while no change was observed with DLL-1 (Fig. 3, C and D). In keeping  
187 with above, DLL-4 also induced release of ATP from platelet dense granules (Fig. 3E). Although  
188 DLL-4, on its own, did not incite platelet aggregation at the doses employed, it could  
189 significantly potentiate thrombin-mediated platelet aggregation (Fig. 4, A and B).

190 As Notch signaling is mediated through activity of  $\gamma$ -secretase leading to cleavage of  
191 Notch receptor, we next investigated the role of this protease in DLL-4-induced platelet  
192 activation. Platelets were pre-treated with DAPT (10  $\mu\text{M}$ ), a specific  $\gamma$ -secretase inhibitor, for  
193 10 min at RT followed by exposure to DLL-4. Interestingly, we observed significant drop in DLL-  
194 4-induced activation of integrin  $\alpha_{IIb}\beta_3$  (Fig. 3, A and B; Figure 3-figure supplement 1), P-selectin  
195 exposure (Fig. 3, C and D) and release of ATP from platelet dense granules (Fig. 3E) when  
196 platelets were pre-incubated with DAPT.

197 P-selectin expressed on stimulated platelets serves as a ligand for P-selectin  
198 glycoprotein ligand-1 (PSGL-1) receptor on leukocytes leading to platelet-leukocyte interaction.

199 As DLL-4 incited P-selectin exposure on platelet surface, we asked next whether it would, too,  
200 prompt interaction between the two cell types. Remarkably, addition of DLL-4 (15 µg/ml, 10  
201 min) to fresh human blood led to significant boost in platelet-neutrophil and platelet-monocyte  
202 aggregates, which was reduced upon pre-treatment with DAPT (40 µM, 10 min) (Figure 3-figure  
203 supplement 2) Above observations underline a critical role of Notch signaling in platelet-  
204 leukocyte interaction and thrombogenesis.

205 Rise in intracellular  $Ca^{2+}$ ,  $[Ca^{2+}]_i$ , is a hallmark of stimulated platelets (Mallick et al.,  
206 2015). We next determined the possible effect of DLL-4 on calcium flux in human platelets.  
207 Interestingly, exposure to DLL-4 (15 µg/ml) for 10 min evoked significant rise (by 1.34-fold) in  
208  $[Ca^{2+}]_i$  in Fura-2 AM-stained platelets in presence of 1 mM extracellular  $Ca^{2+}$  (Fig. 3, F and G). To  
209 validate whether calcium entry from external medium contributed to rise in  $[Ca^{2+}]_i$ , we pre-  
210 treated cells with EGTA (1 mM) followed by incubation with DLL-4. Chelation of extracellular  
211 calcium led to significant drop in rise in  $[Ca^{2+}]_i$  (by 64.87 %), suggestive of DLL-4-mediated  $Ca^{2+}$   
212 influx in these platelets (Fig. 3, F and G).

213 Platelet-derived extracellular vesicles (PEVs) are cellular fragments ranging in size  
214 between 0.1 to 1 µM that are shed by activated platelets (Kulkarni et al., 2019, Heijnen et al.,  
215 1999). PEVs are pro-coagulant in nature that significantly contribute to haemostatic responses  
216 (Sinauridze et al., 2007, Mallick et al., 2015). Exposure of platelets to DLL-4 (15 µg/ml) for 10  
217 min led to extensive shedding of PEVs, which were 4.29-fold higher in count than those  
218 released from vehicle-treated counterparts (Fig. 3H). Interestingly, pre-treatment of platelets  
219 with either DAPT (10 µM) or DBZ (10 µM), specific  $\gamma$ -secretase inhibitors, for 10 min led to

220 significant drop in DLL-4-induced PEVs release (by 45.55 % and 41.98 %, respectively) (Fig. 3H),  
221 thus underscoring critical role of  $\gamma$ -secretase activity.

222 Platelet activation is associated with phosphorylation of multiple cytosolic proteins on  
223 tyrosine residues (Golden et al., 1990). Platelets treated with DLL-4 but not DLL-1 evoked  
224 increased tyrosine phosphorylation of peptides having Mr 72, 95, 110, and 124 kDa (by 27.57 %,  
225 84.16 %, 41.24 % and 49.90 %, respectively), which was reduced by 28.7 %, 30.55 %, 34.28 %  
226 and 35.59 %, respectively, in presence of DAPT and by 7.21 %, 30.55 %, 20.91 % and 41.5 %,  
227 respectively, in presence DBZ. Above observations are indicative of DLL-4- $\gamma$ -secretase axis-  
228 induced flux in tyrosine phosphoproteome in human platelets (Fig. 3I). Thrombin-stimulated  
229 platelets were employed in the study as positive control.

230 Roles of phosphatidylinositol 3 (PI3)-kinase and protein kinase C (PKC) in platelet  
231 activation have been widely reported (Hirsch et al., 2001, Polanowska-Grabowska and Gear,  
232 1999, Atkinson et al., 2001, Watson and Hambleton, 1989). In order to implicate the kinases in  
233 DLL-4-mediated integrin  $\alpha_{IIb}\beta_3$  activation, platelets were pre-treated with either LY-294002 (80  
234  $\mu$ M) or Ro-31-8425 (20  $\mu$ M), inhibitors of PI3-kinase and PKC, respectively, or vehicle for 10 min  
235 at RT, followed by incubation with DLL-4 (15  $\mu$ g/ml) for 10 min. Strikingly, both the inhibitors  
236 triggered significant drop in PAC1 binding to platelets (Figure 3-figure supplement 3), which  
237 underscored role of PI3-Kinase and PKC in DLL-4-induced integrin activation in human platelets.  
238 We next studied the role of AKT downstream of PI3-kinase in DLL-4 treated platelets. DLL-4 (15  
239  $\mu$ g/ml, 10 min) evoked significant upregulation (by 2.35-fold) of AKT phosphorylation on Ser<sup>473</sup>  
240 (Fig. 3, J and K), which was significantly attenuated (by 36.67 %) upon pre-treatment with DAPT

241 (10  $\mu$ M for 10 min) (Fig. 3, J and K). These findings are strongly suggestive of non-canonical  
242 signaling evoked by DLL-4 in human platelets in  $\gamma$ -secretase-dependent manner leading to  
243 platelet activation.

244

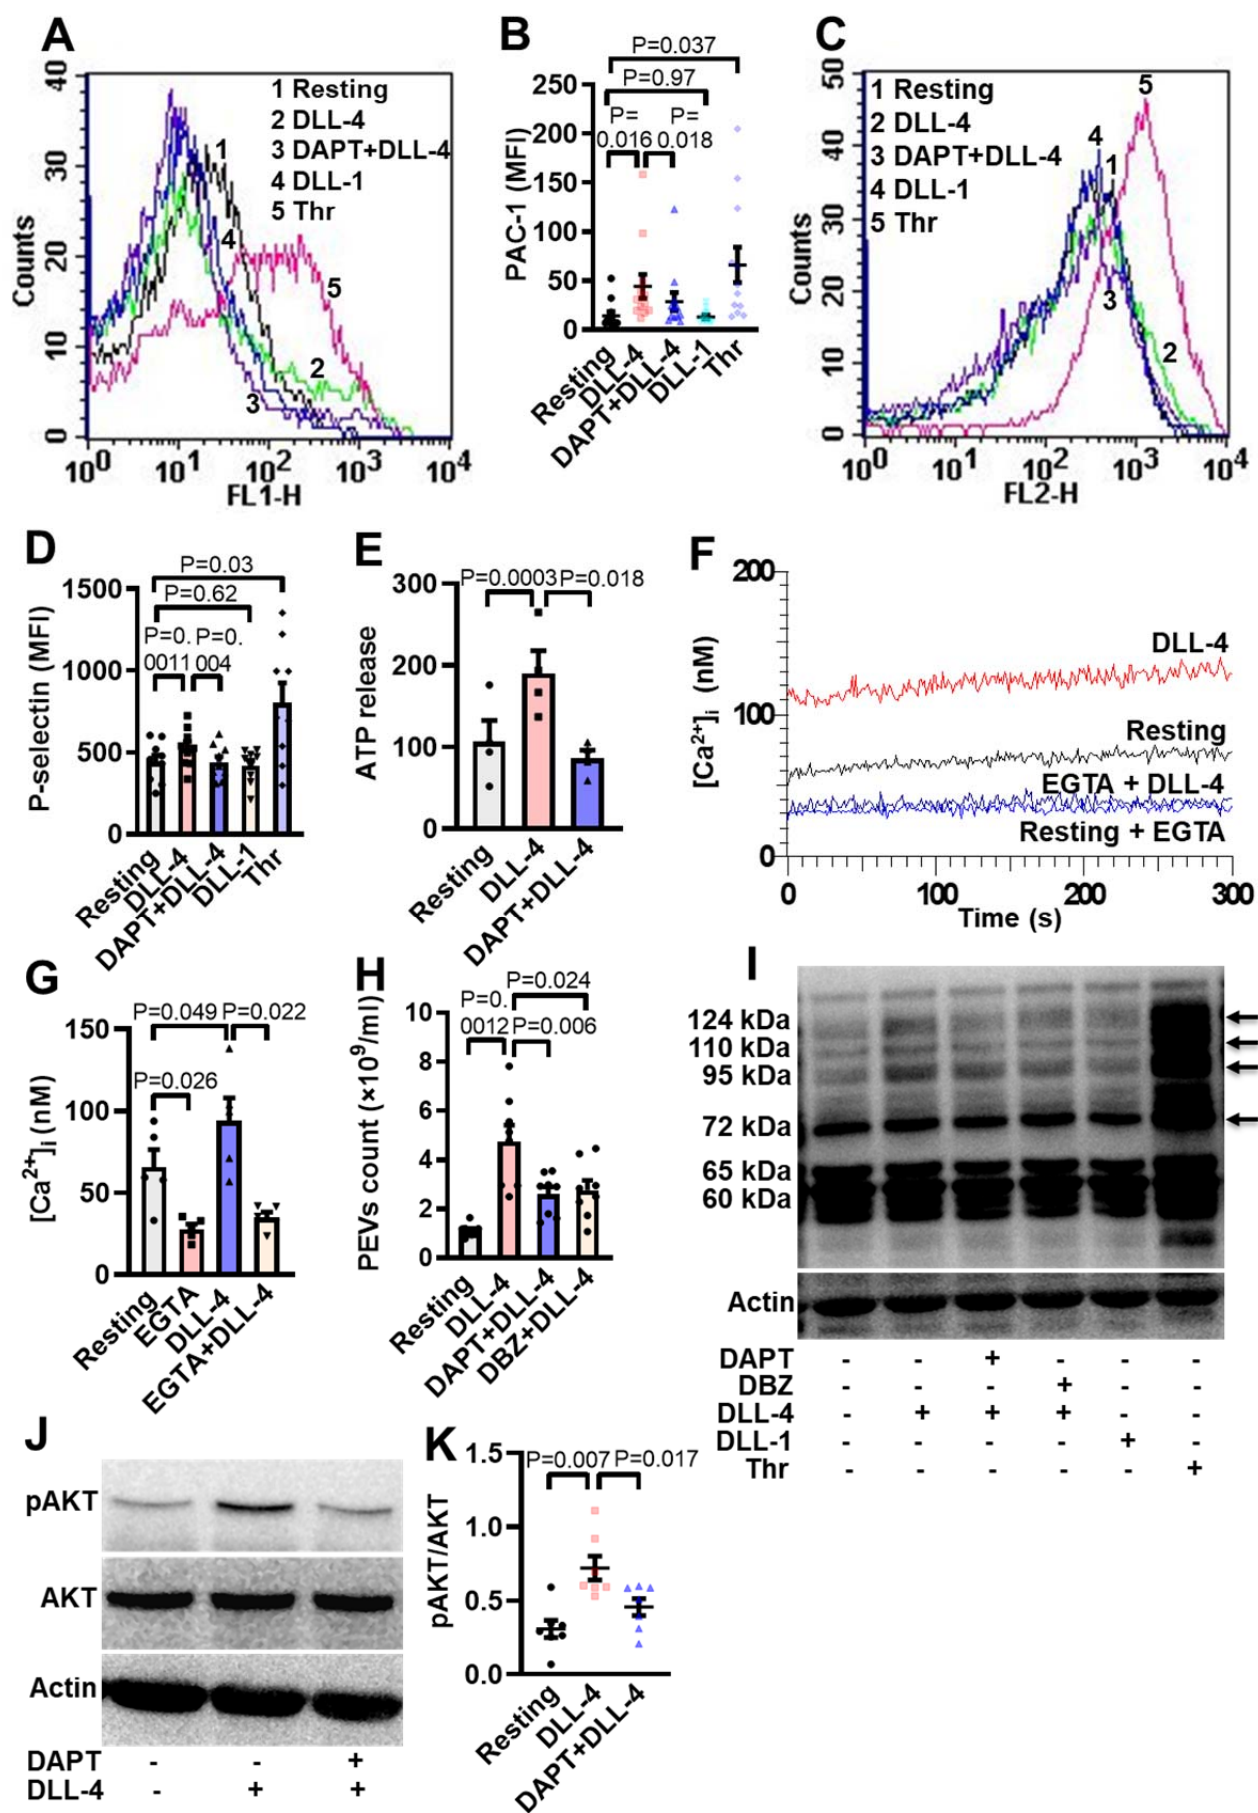



246 **Fig. 3. DLL-4 induces integrin activation, P-selectin externalization, ATP release, extracellular**  
247 **vesicle shedding, rise in intracellular Ca<sup>2+</sup> and increase in tyrosine phosphoproteome in**  
248 **human platelets.** A and C, histograms showing binding of PAC-1 (A) (n=12) and anti-P-selectin  
249 antibody (C) (n=9) to platelets pre-incubated with either DAPT (10 μM) or vehicle for 10 min at  
250 RT followed by treatment with either DLL-4 (15 μg/ml) or DLL-1 (15 μg/ml) for 10 min, or with  
251 thrombin (Thr, 1 U/ml) for 5 min as indicated. B and D, corresponding mean fluorescence  
252 intensity of platelets presented as mean ± SEM. E, bar diagram representing ATP secretion from  
253 platelet dense granules pre-incubated with either DAPT (10 μM) or vehicle for 10 min at RT  
254 followed by treatment with DLL-4 for 10 min (n=4). F, Fura-2-loaded platelets were pre-treated  
255 for 5 min either with calcium (1 mM) or EGTA (1 mM) followed by incubation with DLL-4 (15  
256 μg/ml) for 15 min and intracellular Ca<sup>2+</sup> was measured. G, corresponding bar diagram  
257 representing mean concentration of intracellular calcium over 300 sec of measurement  
258 presented as mean ± SEM (n=5). H, Platelets were pre-treated with either DAPT (10 μM) or DBZ  
259 (10 μM) or vehicle for 10 min at RT followed by treatment with DLL-4 (15 μg/ml) for 10 min at  
260 RT. PEVs were isolated and analysed with Nanoparticle Tracking Analyzer (n=8). I, immunoblot  
261 showing profile of tyrosine phosphorylated proteins in platelets pre-treated with either DAPT  
262 (10 μM) or DBZ (10 μM) or vehicle for 10 min at RT followed by treatment with either DLL-4 (15  
263 μg/ml) for 10 min at RT or DLL-1 (15 μg/ml) for 10 min at RT or with thrombin (1 U/ml) for 5  
264 min at 37 °C as indicated (n=4). Arrows indicate position of peptides whose intensity increased  
265 in presence of DLL-4. J, immunoblot showing expression of pAKT in DLL-4 (15 μg/ml for 10 min)-  
266 treated platelets in absence or presence of either DAPT (10 μM) or vehicle. K, corresponding  
267 densitometric analysis of pAKT normalised with AKT (n=7). Data are representative of at least

268 four different experiments. Analysed by RM one-way ANOVA with either Dunnett's multiple  
269 comparisons test (E, H and K) or Sidak's multiple comparisons test (B, D and G).

#### 270 **DLL-4 operates in a juxtacrine manner to potentiate thrombin-mediated platelet activation**

271 As thrombin triggers synthesis and expression of DLL-4 on platelet surface, which, in  
272 turn, induces platelet activation signaling, we asked next whether DLL-4 synergizes with  
273 thrombin in transforming platelets to 'pro-active / pro-thrombotic' phenotype. Interestingly,  
274 there was significant upregulation in platelet aggregation, PAC-1 binding and P-selectin  
275 externalization when cells were challenged with thrombin (0.1 U/ml) in presence of DLL-4  
276 compared to samples exposed to thrombin alone (Fig. 4, A-F). These parameters were  
277 considerably attenuated (by 50 %, 30.34 %, and 23.05 %, respectively) upon prior exposure to  
278 DAPT (Fig. 4, A-F). As Notch signaling is propagated through direct cell-cell contact in juxtacrine  
279 manner, it is tempting to speculate that cellular proximity achieved within densely packed  
280 thrombus milieu would permit interactions between DLL-4 and Notch1 on surfaces of adjacent  
281 platelets that would synergize with physiological agonists in realizing thrombus consolidation.

282 In order to implicate juxtacrine Notch signaling in amplification of platelet activity, we  
283 forestalled possible interaction between DLL-4 and Notch1 on adjacent cell surfaces by  
284 employing a rabbit polyclonal anti-DLL-4 antibody (20 µg/ml for 5 min) that would block DLL-4.  
285 In control samples a non-specific rabbit IgG (20 µg/ml) substituted the antibody against DLL-4.  
286 Remarkably, presence of anti-DLL-4 antibody significantly impaired (by 81.95 %) platelet  
287 aggregation induced by thrombin (0.1 U/ml) compared with rabbit IgG-treated counterparts  
288 (Fig. 4, G and H). The extent of drop in aggregation directly correlated with concentration of the

289 blocking antibody in the range from 2 to 20  $\mu\text{g/ml}$  (Figure 4-figure supplement 1). Furthermore,  
290 shedding of extracellular vesicles from aggregated platelets was also inhibited significantly (by  
291 56.31 %) when cells were pre-incubated with anti-DLL-4 antibody compared to rabbit IgG-  
292 treated control samples (Fig. 4I). Above observations were strongly suggestive of juxtacrine  
293 Notch signaling operating within the confinement of tightly packed platelet aggregates /  
294 thrombi that potentiates platelet stimulation by thrombin.

295

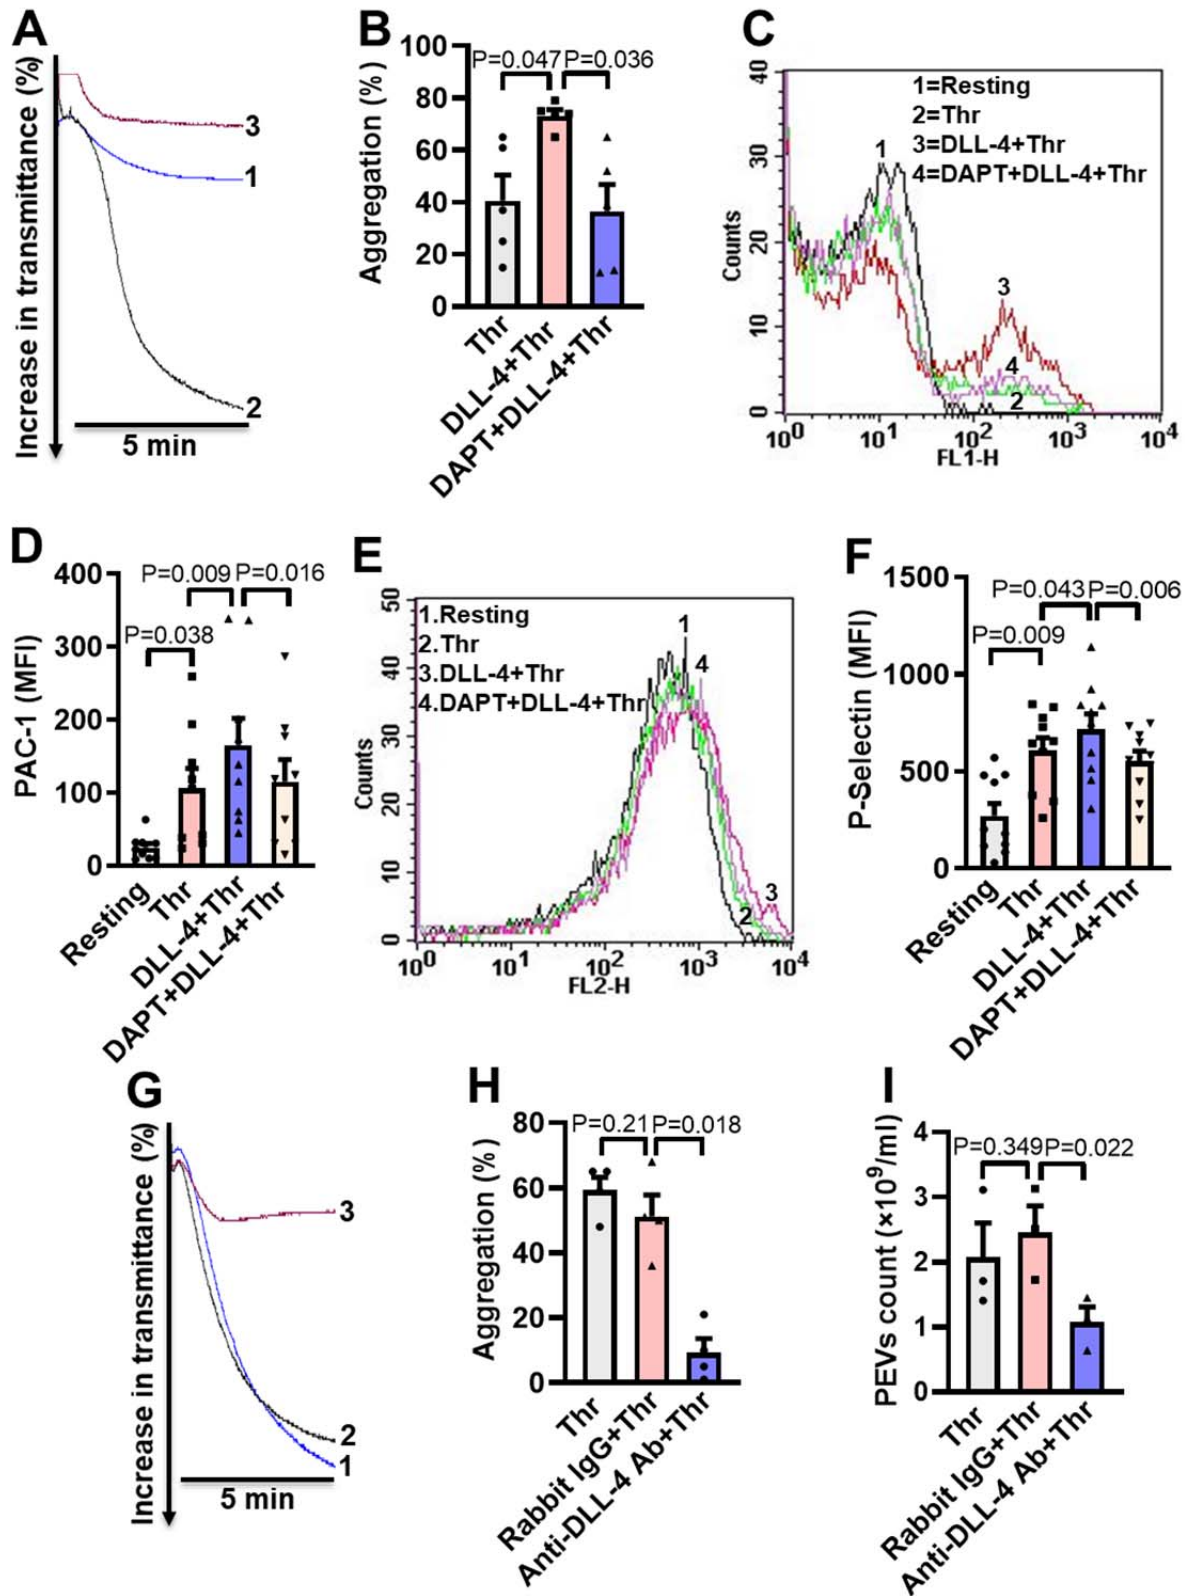

297 **Fig. 4. DLL-4 operates in a juxtacrine manner to potentiate thrombin-mediated platelet**  
298 **activation.** A, aggregation of washed human platelets induced by thrombin (Thr, 0.1 U/ml)  
299 either in presence of vehicle (tracing 1) or DLL-4 (15 µg/ml, tracing 2). Tracing 3 represents cells  
300 pre-incubated with DAPT (20 µM) for 10 min at RT followed by addition of DLL-4 and thrombin.  
301 B, corresponding bar chart representing mean platelet aggregation (n=5). C and E, histograms  
302 representing PAC-1 binding (C) and surface expression of P-selectin (E) in platelets pre-treated  
303 with DLL-4 (7.5 µg/ml) for 10 min followed by thrombin (0.1 U/ml) as indicated. Tracings 4 of C  
304 and E represent cells pre-incubated with DAPT (10 µM) for 10 min at RT followed by addition of  
305 DLL-4 and thrombin. D and F, corresponding mean fluorescence intensity of PAC-1 binding (n=9)  
306 and surface expression of P-selectin (n=10), respectively. G, aggregation of washed human  
307 platelets induced by thrombin (0.1 U/ml) following pre-treatment with either rabbit-IgG (20  
308 µg/ml) for 5 min (tracing 2), or anti-DLL-4 antibody (20 µg/ml) for 5 min (tracing 3). H,  
309 corresponding bar chart representing mean platelet aggregation (n=4). I, Platelets were pre-  
310 treated with either anti-DLL-4 antibody (20 µg/ml) or rabbit IgG (20 µg/ml) or vehicle for 5 min  
311 at RT followed by aggregation induced by thrombin (0.1 U/ml) for 5 min at 37 °C. EVs were  
312 isolated from aggregated platelets and analysed with Nanoparticle Tracking Analyzer (n=3).  
313 Data are representative of at least three different experiments and presented as mean ± SEM.  
314 Analysed by RM one-way ANOVA with either Dunnett's multiple comparisons test (B, H, and I)  
315 or Sidak's multiple comparisons test (D and F).

316 **Inhibition of  $\gamma$ -secretase attenuates agonist-induced platelet responses**

317           Thrombin and collagen are potent physiological agonists that elicit strong wave of  
318 platelet activation through their cognate receptors. Aggregation of washed human platelets  
319 induced by diverse agonists (thrombin, 0.25 U/ml; TRAP, 2.5  $\mu$ M; or collagen, 2.5  $\mu$ g/ml) were  
320 profoundly impaired (by 29.21, 20 and 71.8 %, respectively) by DAPT (20  $\mu$ M) (Fig. 5, A-F),  
321 which, too, retarded TRAP and collagen-mediated aggregation (by 46.88 and 28.97 %,  
322 respectively) in whole blood analysed from electronic impedance (Fig. 5, G-J). Thrombin-  
323 induced ATP release from platelet dense granules was also attenuated when cells were pre-  
324 incubated with DAPT (Fig. 5K). DBZ, another inhibitor of  $\gamma$ -secretase, had similar effect on  
325 platelet activation parameters (data not shown). Interestingly, we also observed significant  
326 abrogation of thrombin-induced binding of PAC-1 (Figure 5-figure supplement 1, A-D) and  
327 fibrinogen (Figure 5-figure supplement 1, E and H) to platelet surface integrins, as well as  
328 decline in surface externalization of P-selectin (Figure 5-figure supplement 2, A-D) and shedding  
329 of extracellular vesicles (Figure 5-figure supplement 3), when cells were pre-incubated with  
330 DAPT (10  $\mu$ M for 10 min at RT), which was suggestive of critical role of Notch signaling in  
331 amplification of agonist-stimulated platelet responses.

332           Platelet interaction with circulating leukocytes is a sensitive index of state of platelet  
333 activity (Cerletti et al., 2012, Ortiz-Muñoz et al., 2014). In order to implicate Notch signaling in  
334 this, platelet-neutrophil and platelet-monocyte aggregates were induced to form in whole  
335 blood with addition of TRAP (2  $\mu$ M, 15 min). Strikingly, percent of cells undergoing aggregation  
336 were found to be significantly restrained upon pre-treatment with DAPT (40  $\mu$ M, 10 min) (Fig. 5,  
337 L-O), which further underlines a role of Notch signaling in platelet-leukocyte interaction and  
338 thrombogenesis.

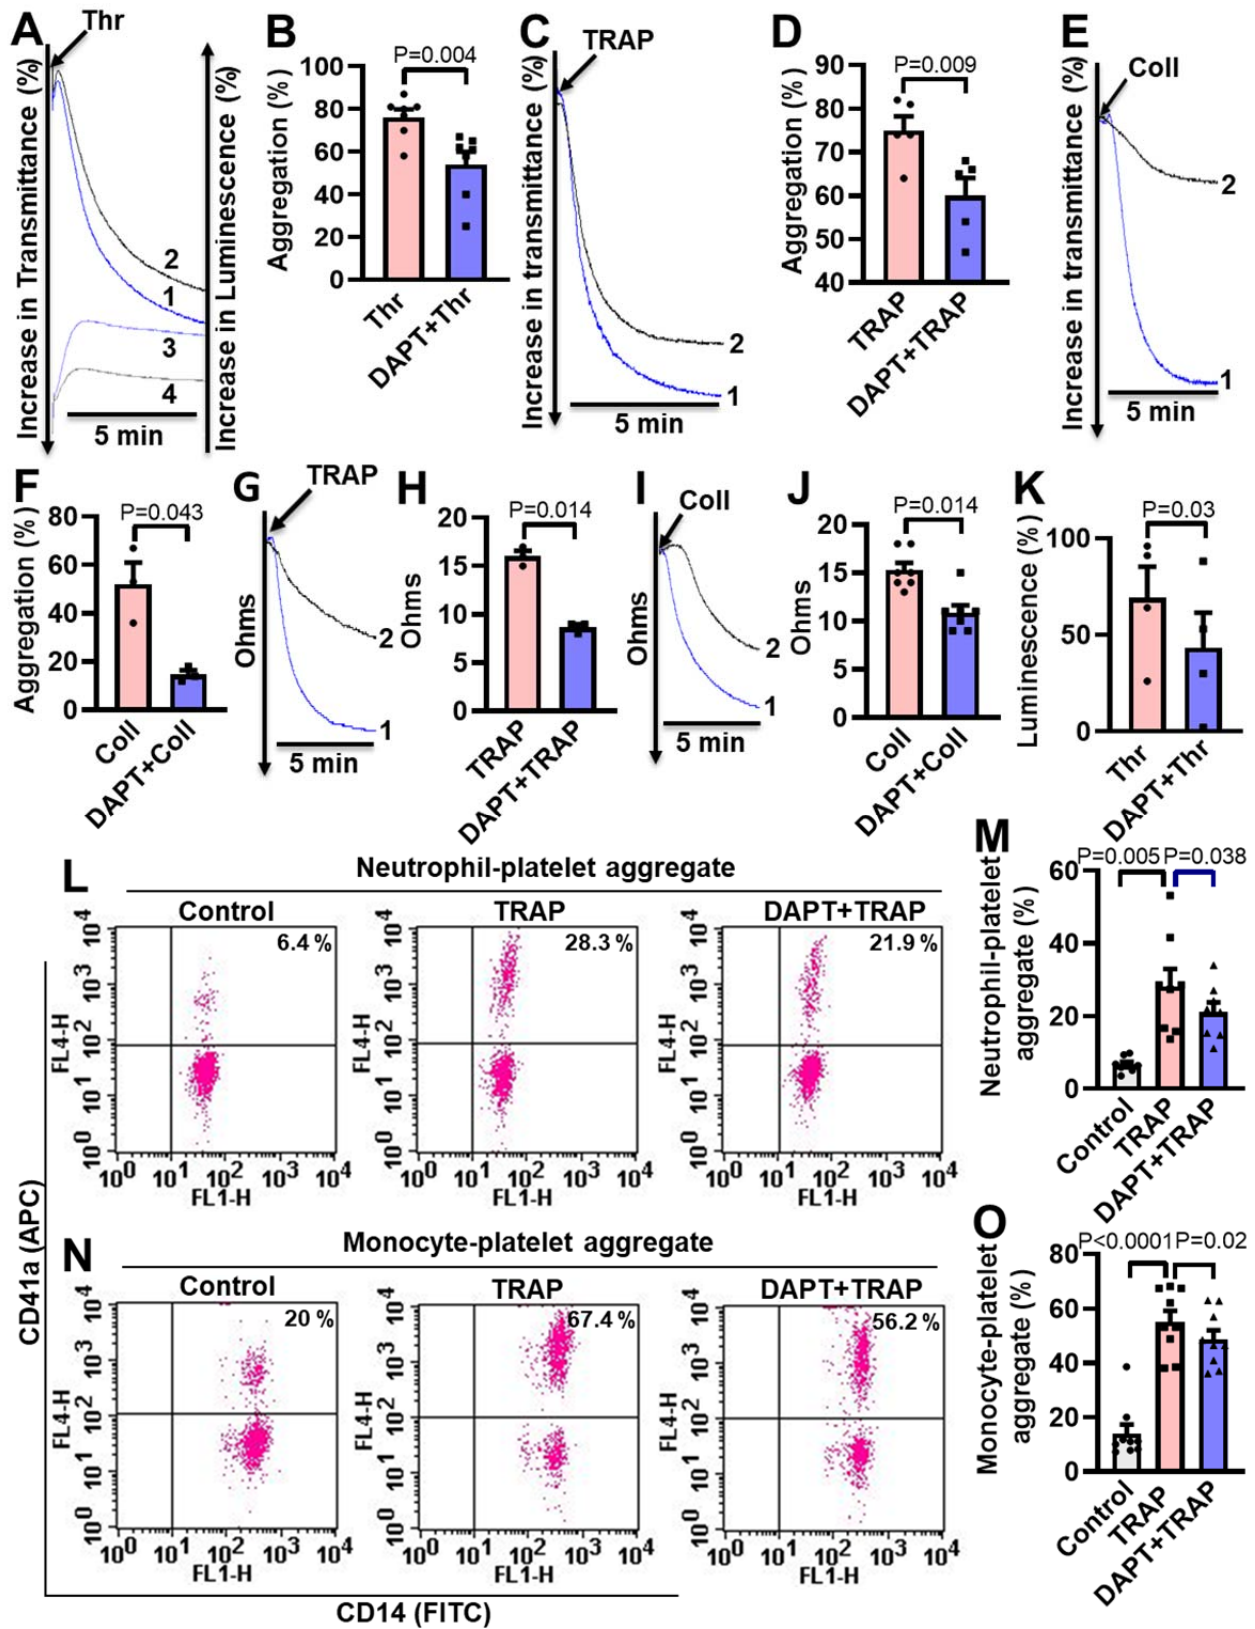

340 **Fig. 5. Inhibition of  $\gamma$ -secretase attenuates agonist-induced platelet responses.** A, C and E,  
341 aggregation of washed human platelets induced by thrombin (Thr, 0.25 U/ml), TRAP (2.5  $\mu$ M),  
342 or collagen (Coll, 2.5  $\mu$ g/ml) in absence (tracing 1) or presence (tracing 2) of DAPT (20  $\mu$ M)  
343 recorded as percent light transmitted. Tracings 3 and 4 in panel A represent secretion of ATP  
344 from thrombin-stimulated platelets either in absence or presence of DAPT, respectively. G and  
345 I, platelet aggregation in whole blood induced by either TRAP (2  $\mu$ M) or collagen (2  $\mu$ M) in  
346 absence (tracing 1) or presence (tracing 2) of DAPT (40  $\mu$ M) recorded as change in electrical  
347 resistance (impedance). B (n=7), D (n=5), F (n=3), H (n=3) and J (n=3), corresponding bar chart  
348 representing mean platelet aggregation. K, bar diagram representing mean ATP secretion from  
349 platelet dense granules (n=4). L and N, flow cytometric analysis of neutrophil-platelet  
350 aggregates (L) and monocyte-platelet aggregates (N) in whole blood stained with anti-CD41a-  
351 APC (specific for platelets) and anti-CD14-FITC (specific for neutrophils/monocytes) followed by  
352 treatment with TRAP (2  $\mu$ M) in presence or absence of DAPT (40  $\mu$ M), as indicated. Amorphous  
353 gates were drawn for monocyte (high fluorescence and low SSC) and neutrophil (low  
354 fluorescence and high SSC) populations. M (n=8) and O (n=9), bar diagrams showing percentage  
355 of neutrophil-platelet and monocyte-platelet aggregate formation, respectively. Data are  
356 representative of at least three different experiments and presented as mean  $\pm$  SEM. Analysed  
357 by either Student's paired *t*-test (B, D, F, H, J, and K) or RM one-way ANOVA with Dunnett's  
358 multiple comparisons test (M and O).

359 **Inhibition of  $\gamma$ -secretase impairs arterial thrombosis in mice and platelet thrombus**  
360 **generation *ex vivo***



361 Platelets play key role in the pathogenesis of arterial thrombosis. In order to implicate  
362 Notch signaling in generation of occlusive intramural thrombi *in vivo*, we studied the effect of  
363 pharmacological inhibitors of  $\gamma$ -secretase in a murine model of mesenteric arteriolar  
364 thrombosis. Platelets were fluorescently labelled and mice were intravenously administered  
365 with either DAPT (50 mg/kg) or vehicle (control). Intramural thrombus was induced by topical  
366 application of ferric chloride in exteriorized mesenteric arterioles. Intravital imaging of  
367 thrombus was carried out by epifluorescence video microscope equipped with high-speed  
368 camera. We observed the time required for first thrombus formation, thrombus growth rate  
369 and time to occlusion as indicators to the initiation, propagation and stabilization of thrombus,  
370 respectively. Remarkably, mice administered with DAPT exhibited significantly delayed  
371 thrombus formation compared to vehicle-treated animals (mean times to form first thrombus:  
372 control,  $7.38 \pm 2.94$  min; DAPT,  $4.25 \pm 1.52$  min) (Fig. 6, A and B) (online Movie S1). DAPT also  
373 impaired thrombus growth rate compared to vehicle-treated control counterparts (Fig. 6C)  
374 (online Movie S2). However, we did not observe significant difference in mean time to stable  
375 occlusion (Fig. 6D). Kaplan-Meier analysis and log-rank test also showed no significant  
376 difference in occlusion times between control and DAPT-treated mice (Figure 6-figure  
377 supplement 1). Above observations attribute a critical role to platelet-specific  $\gamma$ -secretase in  
378 initiation and propagation of arterial thrombosis *in vivo*.

379 Further, in order explore the role of Notch signaling in generation of thrombus *ex vivo*,  
380 we studied platelet dynamic adhesion and thrombus formation on immobilized collagen under  
381 physiological arterial shear ( $1500 \text{ s}^{-1}$ ) employing BioFlux microfluidics platform. Washed human  
382 platelets were pre-treated with either DAPT (20  $\mu\text{M}$ ) or vehicle (control) for 10 min at RT, and

383 allowed to perfuse over the collagen-coated surface for 5 min. Interestingly, we observed  
384 significant reduction (by 44.1 %) in the total surface area covered by platelet thrombi in the  
385 presence of DAPT compared to vehicle-treated control counterparts (Fig. 6, E and F). This  
386 observation also validated a vital role of  $\gamma$ -secretase in thrombosis *in ex vivo*.

387 In keeping with above, we next analysed the contribution of Notch signaling on intrinsic  
388 pathway of blood coagulation by employing kaolin-activated thromboelastography. Pre-  
389 treatment with DAPT (20  $\mu$ M) significantly prolonged the reaction time (R) from  $5.48 \pm 0.52$  to  
390  $7.28 \pm 1.06$  min and attenuated maximum amplitude (MA) by 7.43 % (Fig. 6, G-I; Table S1),  
391 which was reflective of delayed formation of thrombus that was significantly less stable as  
392 compared with control counterpart with optimal  $\gamma$ -secretase activity. Thus, observations from  
393 the *in vivo* murine model of thrombosis as well as thromboelastography underscored an  
394 indispensable role of Notch pathway in determining thrombus stability.

395

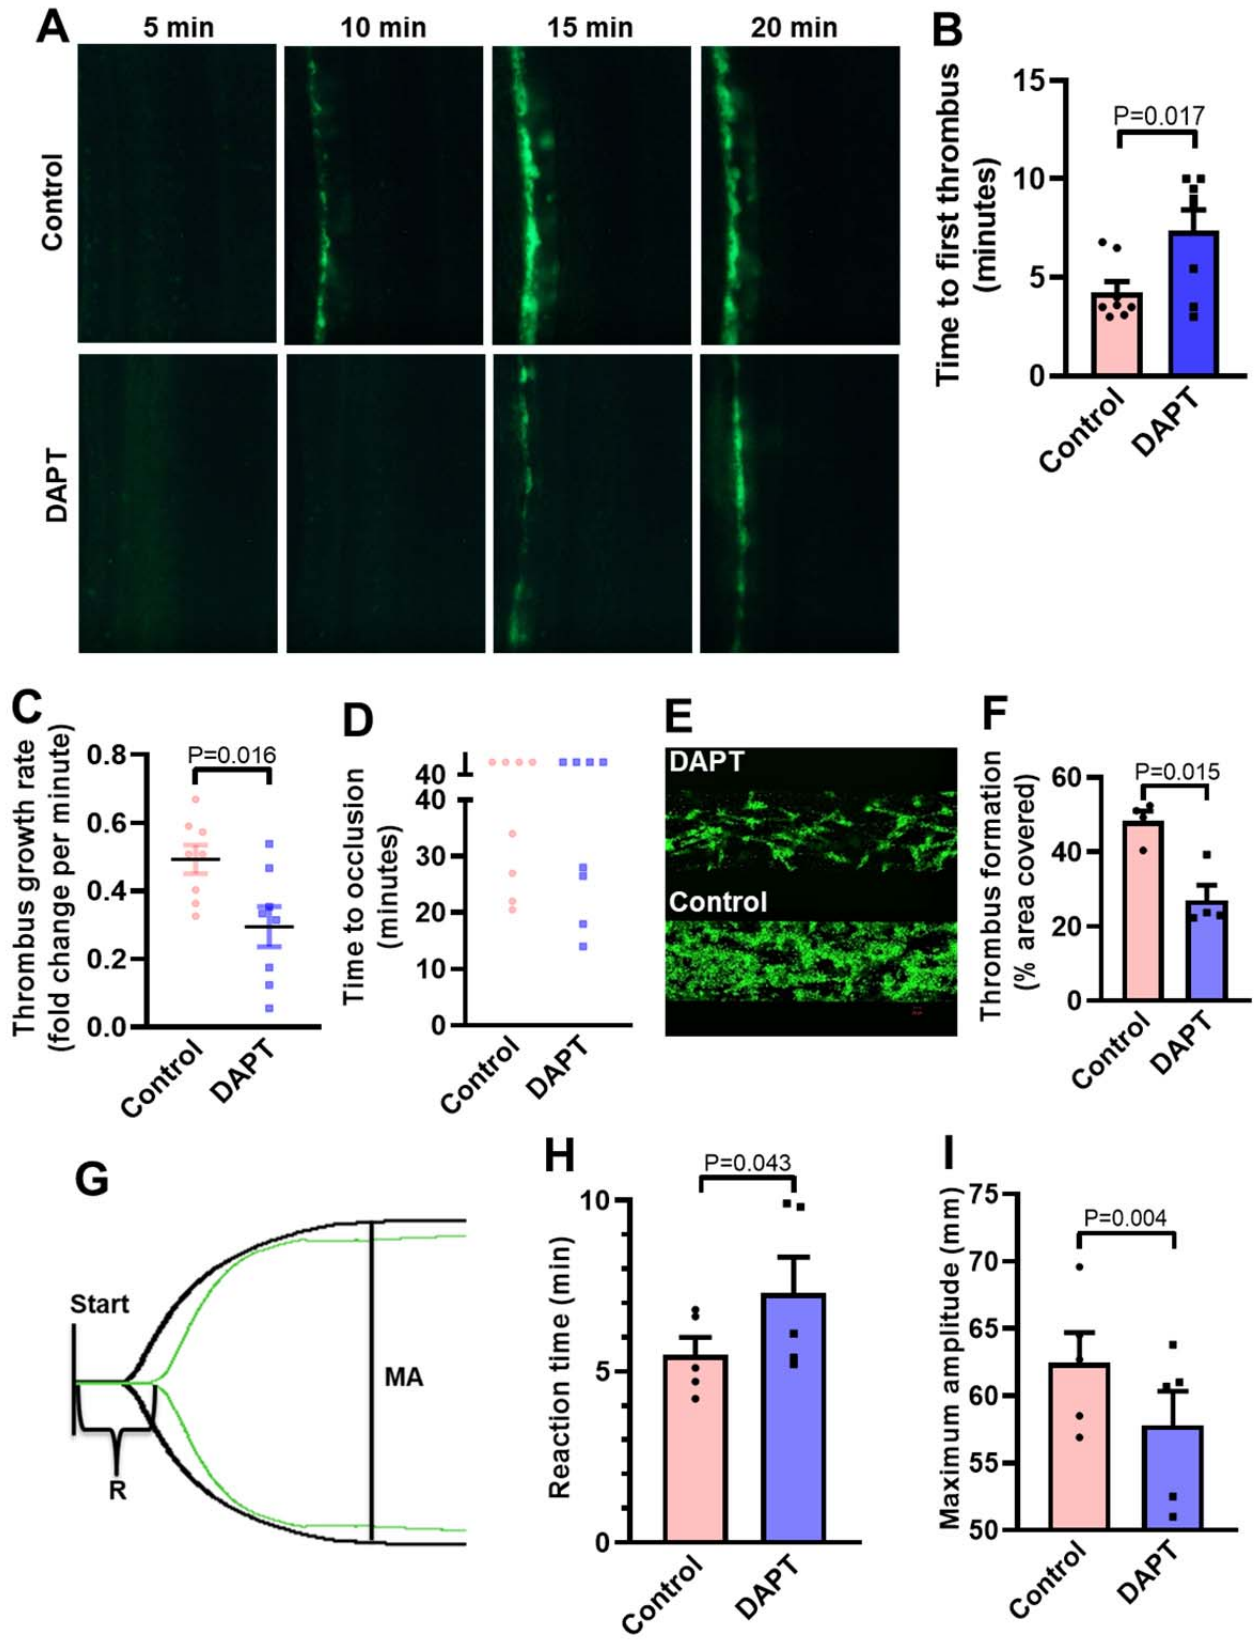

397 **Fig. 6. Inhibition of  $\gamma$ -secretase precludes arterial thrombosis in mice and platelet thrombus**  
398 **generation *in ex vivo*.** A, representative time-lapse images showing mesenteric arteriolar  
399 thrombosis in mice, pre-administered with either vehicle (control) or DAPT (50 mg/kg) captured  
400 5, 10, 15 or 20 min after ferric chloride-induced injury of the mesenteric arterioles. B-D, scatter  
401 dot plots showing time to first thrombus formation (B), thrombus growth rate (C) and time to  
402 occlusion (D) (n=8). E, representative image of platelet accumulation after 5 min of perfusion of  
403 human platelets pre-treated with either DAPT (20  $\mu$ M) or vehicle. F, corresponding bar diagram  
404 representing average surface area covered by platelet thrombi after 5 min of perfusion on  
405 collagen matrix (n=4). G, thromboelastogram of kaolin-stimulated citrated whole blood pre-  
406 incubated with (green tracing) or without DAPT (black tracing). H and I, bar diagram  
407 representing reaction time (R) and maximum amplitude (MA) of the clot, respectively (n=5).  
408 Data are representative of at least four individual experiments and presented as mean  $\pm$  SEM.  
409 Analysed by either unpaired (B and C) or paired (F, H, and I) Student's *t*-test (unpaired for *in*  
410 *vivo* and paired for *in vitro*).

411

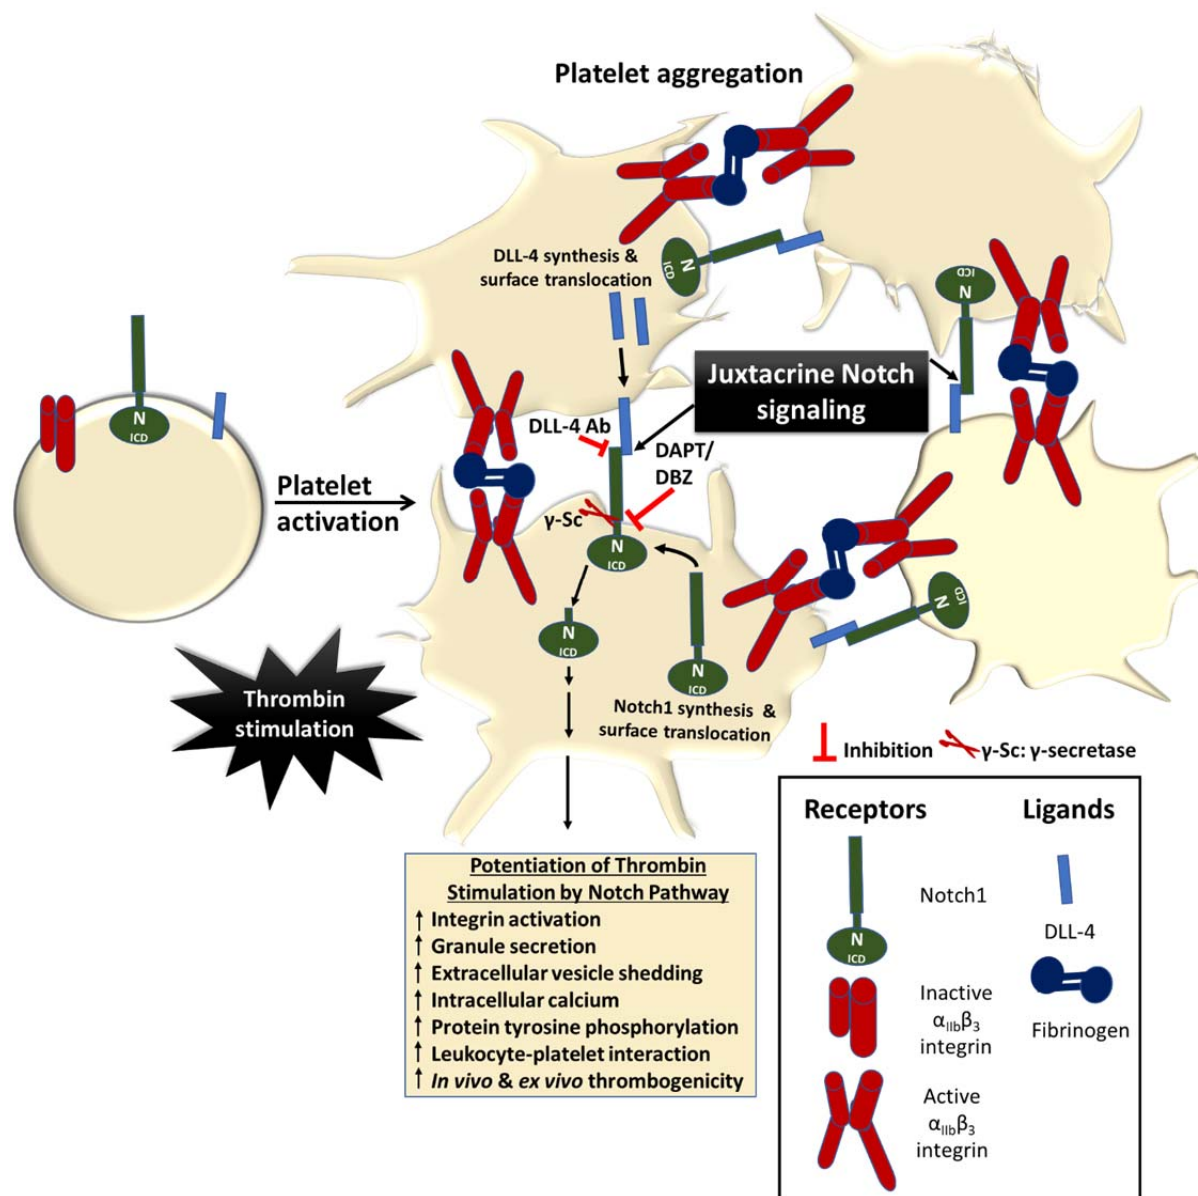

412

413 **Fig. 7. Scheme depicting the role of Notch signaling in potentiating agonist-induced platelet**  
 414 **stimulation.** Juxtacrine interaction between DLL-4 and Notch1 expressed on surfaces of  
 415 agonist-stimulated platelets that remain in close proximity within platelet aggregates, leading  
 416 to potentiation of thrombin signaling and consolidation of thrombus. The juxtacrine responses

417 are blocked by employing either anti-DLL-4 antibody (blocking antibody) or inhibitors of  $\gamma$ -  
418 secretase.

419 **DISCUSSION:**

420 The Notch signaling has been implicated in production of megakaryocytes and platelets  
421 from CD34<sup>+</sup> cells (Poirault-Chassac et al., 2010). However, expression of Notch receptors and its  
422 functionality in human platelets has remained unexplored. Notch signaling is mediated through  
423 4 isoforms of mammalian Notch receptors, namely Notch1 to Notch4, which interact with 5  
424 independent Notch ligands, DLL-1, -3, -4 and Jagged-1 and -2 (Kopan and Ilagan, 2009). In this  
425 report we have demonstrated that, enucleate platelets have notable expression of Notch1 and  
426 its ligand DLL-4, which function in a non-canonical manner to synergize with physiological  
427 platelet agonists, leading to generation of prothrombotic phenotype. Although platelets have  
428 limited protein-synthesizing ability, exposure to thrombin instigated significant translation of  
429 DLL-4 and Notch1 in puromycin-sensitive manner, thus adding them to the growing repertoire  
430 of platelet transcriptome. Strikingly, thrombin, too, provoked translocation of these peptides to  
431 platelet surface membrane, raising possibility of juxtaposition DLL-4-Notch1 interaction within the  
432 confinement of platelet aggregates. DLL-4 stimulated significant rise in expression of NICD, the  
433 cleavage product of Notch, that signifies the existence of functional DLL-4-Notch1-NICD  
434 signaling axis in platelets.

435 Platelets are central players in hemostasis and pathological thrombosis that can lead to  
436 occlusive cardiovascular pathologies like myocardial infarction and ischemic stroke. Upon  
437 activation platelet surface integrins  $\alpha_{IIb}\beta_3$  switch to an open conformation, which allows high-

438 affinity binding of fibrinogen and cell-cell aggregate formation, surface mobilization of P-  
439 selectin and rise in intracellular free calcium. In our quest to explore the non-genomic role of  
440 Notch pathway in platelet biology, we discovered that DLL-4 and not DLL-1 was able to instigate  
441 significant binding of PAC-1 (that recognizes the open conformation of  $\alpha_{IIb}\beta_3$ ) and fibrinogen to  
442 platelets, associated with exocytosis of contents of alpha and dense granules, which was  
443 consistent with switch to a 'pro-active / pro-thrombotic' phenotype. DLL-4, too, provoked  $Ca^{2+}$   
444 influx leading to substantial rise in intracellular  $Ca^{2+}$ , extracellular vesicle shedding, platelet-  
445 leucocyte aggregate formation and increase in platelet tyrosine phosphoproteome, all  
446 hallmarks of stimulated platelets. Notably, inhibition of  $\gamma$ -secretase employing two  
447 pharmacologically different compounds significantly impaired DLL-4-mediated 'pro-activating'  
448 effects on platelets. Inhibitors of either PI3-kinase or protein kinase C evoked remarkable  
449 decrease in PAC1 binding, which underlines contributions of these enzymes in DLL-4-induced  
450 integrin activation. AKT phosphorylation, downstream of PI3-kinase, was significantly increased  
451 in platelets treated with DLL-4, which was attenuated upon pre-treatment of cells with DAPT.  
452 In sum, above findings are strongly suggestive of non-canonical signaling triggered by DLL-4 in  
453 human platelets that operates in  $\gamma$ -secretase-dependent manner leading to platelet activation.

454         Thrombin is a potent physiological agonist that induces platelet aggregation and  
455 secretion through cognate PAR receptors. As thrombin amplifies expression of DLL-4 on platelet  
456 surface and DLL-4, in turn, induces platelet activation signaling, we asked whether DLL-4  
457 synergizes with thrombin in stimulation of platelets. Pre-treatment of cells with DLL-4 followed  
458 by low dose (0.1 U/ml) thrombin significantly upregulated platelet aggregation, PAC-1 binding  
459 and P-selectin exposure elicited by thrombin alone, which underlines a potentiating effect by

460 DLL-4. These responses were considerably abrogated by inhibitors of  $\gamma$ -secretase that further  
461 authenticates contribution of Notch signaling in platelet activation. Platelet aggregation  
462 induced by diverse agonists including thrombin, collagen and TRAP was also restrained by  
463 inhibiting  $\gamma$ -secretase activity. Remarkably, pharmacological inhibition of  $\gamma$ -secretase  
464 significantly impaired thrombus formation in a murine model of mesenteric arteriolar  
465 thrombosis and platelet thrombus generation *ex vivo*. Kaolin-activated thromboelastography,  
466 too, validated delayed formation of thrombus that was significantly less stable compared with  
467 control counterpart having optimal  $\gamma$ -secretase activity. Taken together, above observations  
468 underscored seminal contribution from DLL-4-Notch1- $\gamma$ -secretase axis in amplification of  
469 agonist-mediated platelet responses and determination of thrombus stability.

470 As direct cell-cell contact is the mainstay of Notch signaling, it is reasonable to  
471 speculate interactions between DLL-4 and Notch1 on surfaces of adjacent platelets, which are  
472 closely approximated within the densely packed thrombus milieu. In order to validate it, we  
473 blocked proximity between DLL-4 and Notch1 by pre-incubating platelets with a rabbit  
474 polyclonal anti-DLL-4 antibody, followed by stimulation with thrombin. In control samples, a  
475 non-specific rabbit IgG substituted the antibody against DLL-4. Remarkably, presence of  
476 blocking antibody significantly impaired platelet aggregation evoked by thrombin compared  
477 with the rabbit IgG-treated counterparts. The extent of drop in aggregation directly correlated  
478 with concentration of the blocking antibody. In keeping with it, shedding of extracellular  
479 vesicles from aggregated platelets was also potentially inhibited when cells were pre-incubated  
480 with anti-DLL-4 antibody, and not with rabbit IgG. Above observations were overwhelmingly



481 supportive of juxtacrine Notch signaling operating within the tightly packed platelet aggregate  
482 / thrombus milieu that potentiates platelet stimulation by physiological agonists.

483 In conclusion, we provide compelling evidence in favour of a non-canonical Notch  
484 signaling pathway operative in enucleate platelets that contributes significantly to the stability  
485 of occlusive arterial thrombus as well as to platelet activation instigated by thrombin through  
486 juxtacrine interactions (Fig. 7). This is not out of place here to mention that  $\gamma$ -secretase, too, is  
487 responsible for cleavage of amyloid-precursor proteins (APP) releasing amyloid- $\beta$  ( $A\beta$ )  
488 (Tarassishin et al., 2004). Platelets, which contribute to 95% of circulating APP in body (Li et al.,  
489 1999, Davies et al., 1997, Bush et al., 1990), are known to generate  $A\beta_{40}$  upon stimulation with  
490 physiological agonists like thrombin or collagen in a PKC-dependent manner (Smith and Broze,  
491 1992, Skovronsky et al., 2001), leading to rise in local concentration of  $A\beta$  within the thrombus  
492 (Skovronsky et al., 2001, Smith, 1997). As our laboratory and others have demonstrated  $A\beta$  to  
493 be a potent stimulus for platelets with thrombogenic attributes (Sonkar et al., 2014, Shen et al.,  
494 2008, Canobbio et al., 2014), pharmacologic inhibition of  $\gamma$ -secretase in platelets would prohibit  
495 release of both NICD and  $A\beta$  that may be envisaged as an effective multimodal anti-platelet  
496 strategy leading to thrombus destabilization. Besides, antibody against DLL-4 may be employed  
497 therapeutically to forestall DLL-4-Notch1 interaction on surfaces of adjacent platelets as a  
498 potential anti-thrombotic approach.

## 499 **MATERIALS AND METHODS**

### 500 **MATERIALS**

501           Antibodies against Notch1 (# 4380) and DLL-4 (# NB600 892) were purchased from Cell  
502 Signaling Technology and Novus Biologicals, respectively. Antibodies against Notch intracellular  
503 domain (NICD) (cleaved Notch1) (# 4147), phospho(Ser-473) -AKT (# 4051), AKT (# 9272) and  
504 Anti-p-Tyr (PY99, #sc-7020) were procured from Cell Signaling Technology and Santa Cruz  
505 Biotechnology, respectively. DLL-1 (# 11635-H08H) and DLL-4 (# 10171-H02H) recombinant  
506 human proteins were products from Sino Biological. Anti-CD62P (# 550561), anti-PAC-1 (#  
507 340507), anti-CD14 (# 555397) and anti-CD41a (#559777) antibodies, and BD FACS Lysing  
508 Solution (# 349202) were from BD Biosciences. Anti-actin antibody (# A2066), IgG from rabbit  
509 serum (# I5006,) DAPT (N-(N-(3, 5-difluorophenacetyl)-L-alanyl)-S-phenyl-glycine *t*-butyl ester)  
510 (# D5942), acetylsalicylic acid, skimmed milk powder, thrombin, MnCl<sub>2</sub>, LY-294002, ethylene  
511 glycol tetraacetic acid (EGTA), ethylenediaminetetraacetic acid (EDTA), thrombin receptor-  
512 activating peptide (TRAP, # S1820), Prostaglandin E<sub>1</sub> (# P5515) and DMSO were from Sigma.  
513 Fura-2 AM (# 344905) was purchased from Calbiochem. Collagen (# 385) and Chrono-lume  
514 luciferin luciferase reagent (# 395) were products of Chrono-log. Polyvinylidene fluoride (PVDF)  
515 membrane, enhanced chemiluminescence (ECL) kit and Ro-31-8425 (# 557514) were from  
516 Millipore. Cell Titer-Glo Luminescent Cell Viability Assay Kit (# G7570) was from Promega.  
517 Diethylpyrocarbonate (DEPC) (# E174) and bovine serum albumin were procured from Amresco.  
518 TRIzol, fibrinogen (Alexa Fluor 488-conjugated) (# F13191) and goat-anti-rabbit IgG (Alexa Fluor  
519 488-conjugated) (# A11008) were from Invitrogen. Dibenzazepine (DBZ) (# YO-01027) was from  
520 Selleckchem. High-capacity reverse transcription kit (# 4368814) was purchased from Applied  
521 Biosystems. Primers (forward and reverse) were obtained from Eurofins/Operon. SYBR Green  
522 SuperMix was from Bio-Rad. Goat anti-rabbit IgG and goat-anti-mouse IgG (HRP-conjugated)

523 antibodies were from Bangalore Genei. Restore Western blot stripping buffer (# 21059) was  
524 from Thermo Fisher Scientific. Triton X-100, Tween-20, CaCl<sub>2</sub> and reagents for electrophoresis  
525 were purchased from Merck. All other reagents were of analytical grade. Type I deionized water  
526 (18.2 MΩ.cm, Millipore) was used for preparation of solutions. Experiments were carried out  
527 strictly as per the guidelines of Institutional Ethical Committee.

## 528 **METHODS**

### 529 **Study Design**

530 No calculations were performed to predetermine sample size. Each experiment was  
531 performed independently at least three times or chosen based on effect size observed during  
532 pilot experiments for subsequent statistical analysis. No inclusion and exclusion criteria were  
533 set for experimental units or data points. No outliers were excluded from the analysis. The  
534 results reported for all in vitro and ex vivo experiments represent biological replicates (paired  
535 observations made on whole blood and/or platelet populations isolated from different healthy  
536 volunteers). The results were successfully reproduced with each biological replicate. The results  
537 of all in vivo experiments represent independent observations in individual mice. All attempts  
538 at reproducing results were successful. All in vitro and ex vivo experiments involved paired  
539 observations. No randomization was performed for in vivo experiments. Mice allocated to  
540 either control or treatment groups were matched for age, sex and body weight. Other  
541 confounding factors were not controlled. Investigators were not blinded to group allocation  
542 during data collection and/or analysis.

543 **Platelet preparation**

544 Platelets were isolated from freshly drawn human blood by differential centrifugation.  
545 Briefly, peripheral venous blood collected in acid citrate dextrose (ACD) vial was centrifuged at  
546 100 X g for 20 min to obtain platelet-rich plasma (PRP). PRP was then centrifuged at 800 X g for  
547 7 min to sediment platelets after adding 1  $\mu$ M PGE<sub>1</sub> and 2mM EDTA. Pellet was washed with  
548 buffer A (20 mM HEPES, 138 mM NaCl, 2.9 mM KCl, 1 mM MgCl<sub>2</sub>, 0.36 mM NaH<sub>2</sub>PO<sub>4</sub>, 1 mM  
549 EGTA, pH 6.2) supplemented with 5 mM glucose, 0.35 g/dl BSA and 1  $\mu$ M PGE<sub>1</sub>. Finally, platelets  
550 were resuspended in buffer B (20 mM HEPES, 138 mM NaCl, 2.9 mM KCl, 1 mM MgCl<sub>2</sub>, 0.36  
551 mM NaH<sub>2</sub>PO<sub>4</sub>, pH 7.4) supplemented with 5 mM glucose. The final cell count was adjusted to 2-  
552 4 X 10<sup>8</sup> cells/ml using automated cell counter (Multisizer 4, Beckman Coulter). Leukocyte  
553 contamination in platelet preparation was found to be less than 0.015%. All steps were carried  
554 out under sterile conditions and precautions were taken to maintain the cells in resting  
555 condition. Blood samples were drawn from healthy adult human participants after obtaining  
556 written informed consent, strictly as per recommendations and as approved by the Institutional  
557 Ethical Committee of the Institute of Medical Sciences, Banaras Hindu University (Approval No.  
558 Dean/2015-16/EC/76). The study methodologies conformed to the standards set by the  
559 Declaration of Helsinki.

560 **Platelet aggregation**

561 Washed human platelets were stirred (12000 rpm) at 37 °C in a whole blood/optical  
562 lumi-aggregometer (Chrono-log model 700-2) for 1 min, followed by addition of agonist  
563 (thrombin, TRAP, or collagen) either in presence or absence of reagents. Aggregation was

564 recorded as percent light transmitted through the sample as a function of time, while blank  
565 represented 100 % light transmission. Platelet aggregation in whole blood, induced by either  
566 TRAP or collagen was recorded as change in electrical resistance (impedance) as a function of  
567 time.

## 568 **Western analysis**

569 Proteins from platelet lysate were separated on 10 % SDS-PAGE and electrophoretically  
570 transferred onto PVDF membranes by employing either a TE77 PWR semi dry blotter (GE  
571 Healthcare) at 0.8 mA/cm<sup>2</sup> for 1 h 45 min or Trans-Blot Turbo Transfer System (Bio-Rad) at 20  
572 V/1.3 A for 30 min (for Notch1 and cleaved Notch1/NICD) or 20 min (for DLL-4, pY99 and pAKT).  
573 Membranes were blocked with either 5 % skimmed milk or 5 % bovine serum albumin in 10  
574 mM Tris HCl, 150 mM NaCl, pH 8.0 containing 0.05 % Tween 20 (TBST) for 1 h at room  
575 temperature (RT) to block residual protein binding sites. Membranes were incubated overnight  
576 at 4 °C with specific primary antibodies (anti-Notch1, 1:1000; anti-DLL-4, 1:1000; anti-cleaved  
577 Notch1 / NICD, 1:1000; anti-pY99, 1:5000; anti-pAKT, 1:1000; anti-AKT, 1:1000; anti-actin,  
578 1:5000), followed by 3 washings with TBST for 5 min each. Blots were incubated with HRP-  
579 conjugated secondary antibodies (goat-anti-rabbit, 1:2500 for anti-Notch1, anti-DLL-4, anti-  
580 cleaved Notch1, 1:1500 for anti-AKT and 1:40000 for anti-actin; and goat anti-mouse, 1:50000,  
581 for anti-pY99, 1:1000 for anti-pAKT) for 1 h and 30 min at RT, followed by similar washing steps.  
582 Antibody binding was detected using enhanced chemiluminescence detection kit (Millipore).  
583 Membranes stained for pAKT were subsequently stripped by incubating in stripping buffer at RT  
584 for 30 min, washed, blocked and reprobed employing anti-AKT antibody. Images were acquired

585 on multispectral imaging system (UVP BioSpectrum 800 Imaging System) and quantified using  
586 VisionWorks LS software (UVP).

### 587 **Analysis of Notch1 and DLL-4 expression on platelet surface**

588 Washed human platelets were stimulated with thrombin (1 U/ml) at 37 °C for 5 min  
589 under non-stirring condition. Cells were incubated with either anti-Notch1 antibody (1:100) for  
590 1 h at RT or anti-DLL-4 antibody (1:500) for 30 min at RT, followed by staining with Alexa Fluor  
591 488-labelled anti-rabbit IgG (1:100, for Notch1; and 1:200, for DLL-4), for 30 min at RT in dark.  
592 Cells were washed, resuspended in sheath fluid and were analysed on a flow cytometer  
593 (FACSCalibur, BD Biosciences). Forward and side scatter voltages were set at E00 and 350,  
594 respectively, with a threshold of 52 V. An amorphous gate was drawn to encompass platelets  
595 separate from noise and multi-platelet particles. All fluorescence data were collected using 4-  
596 quadrant logarithmic amplification for 10000 events in platelet gate from each sample and  
597 analyzed using CellQuest Pro Software.

### 598 **Secretion from platelet $\alpha$ -granules and dense bodies**

599 Secretion from platelet  $\alpha$ -granules in response to a stimulus was quantified by surface  
600 expression of P-selectin (CD62P). Washed human platelets pre-treated with either DAPT (10  
601  $\mu$ M) or vehicle for 10 min at RT followed by treatment with either DLL-4 (15  $\mu$ g/ml) or DLL-1 (15  
602  $\mu$ g/ml) for 10 min at RT. In other experiments cell were pre-incubated with DLL-4 (7.5  $\mu$ g/ml)  
603 followed by stimulation with thrombin (0.1 U/ml) for 5 min 37 °C. Cells were stained with PE-  
604 labelled anti-CD62P antibody (5 % v/v) for 30 min at RT in dark. Samples were suspended in  
605 sheath fluid and subjected to flow cytometry. Secretion of adenine nucleotides from platelet

606 dense granules was measured employing Chrono-lume reagent (stock concentration, 0.2  $\mu$ M  
607 luciferase/luciferin). Luminescence generated was monitored in a lumi-aggregometer  
608 contemporaneous with platelet aggregation (see above). Alternatively, dense granule releasate  
609 was quantitated using Cell Titer-Glo Luminescent Cell Viability Assay Kit where cells were  
610 sedimented at 800 $\times$ g for 10 min and supernatant was incubated with equal volume of Cell  
611 Titer-Glo reagent for 10 min at RT. Luminescence was recorded in a multimodal microplate  
612 reader (BioTeK model Synergy H1).

### 613 **Study of platelet integrin activation and fibrinogen binding**

614 Platelet stimulation induces conformational switch in integrins  $\alpha_{IIb}\beta_3$  that allows high-  
615 affinity binding of fibrinogen leading to cell-cell aggregate formation. Washed human platelets  
616 were pre-treated with either DAPT (10  $\mu$ M), LY-294002 (80  $\mu$ M) or Ro-31-8425 (20  $\mu$ M) or  
617 vehicle for 10 min at RT followed by exposure to DLL-4 (15  $\mu$ g/ml) or DLL-1 (15  $\mu$ g/ml) for 10  
618 min at RT. In other experiments cells were pre-incubated with DLL-4 (7.5  $\mu$ g/ml) followed by  
619 stimulation with thrombin (0.1 U/ml) for 5 min 37 °C. Cells were stained with either FITC-  
620 labelled PAC-1 antibody that specifically recognizes active conformation of  $\alpha_{IIb}\beta_3$  (5 % v/v) or  
621 Alexa Fluor 488-labelled fibrinogen (10  $\mu$ g/ml) for 30 min at RT in dark. Samples were finally  
622 suspended in sheath fluid, and analyzed by flow cytometry.

### 623 **Isolation and analysis of platelet-derived extracellular vesicles (PEVs)**

624 PEVs were isolated and characterized as described previously (Chaurasia et al., 2019,  
625 Kushwaha et al., 2018). Platelets were pre-incubated either with DAPT (10  $\mu$ M) or DBZ (10  $\mu$ M)  
626 for 10 min, followed by treatment with DLL-4 (15  $\mu$ g/ml) for 10 min at room temperature. Cells

627 were sedimented at 800×g for 10 min, and then at 1200×g for 2 min at 22 ° C to obtain PEVs  
628 cleared of platelets, which were analyzed with Nanoparticle Tracking Analyzer (NTA) where a  
629 beam from solid-state laser source (635 nm) was allowed to pass through the sample. Light  
630 scattered by rapidly moving particles in suspension in Brownian motion at room temperature  
631 was observed under 20X microscope. This revealed hydrodynamic diameters of particles,  
632 calculated using Stokes Einstein equation, within range of 10 nm to 1 µm and concentration  
633 between 10<sup>7</sup>–10<sup>9</sup>/ml. The average distance moved by each EV in x and y directions were  
634 captured with CCD camera (30 frames per sec) attached to the microscope. Both capture and  
635 analysis were performed using NanoSight LM10 (Malvern) and NTA 2.3 analytical software,  
636 which provide an estimate of particle size and counts in sample.

#### 637 **Measurement of intracellular free calcium**

638 Intracellular calcium was measured as described (Chaurasia et al., 2019). Briefly,  
639 platelet-rich plasma (PRP) was isolated from fresh human blood and incubated with Fura-2 AM  
640 (2 µM) at 37 °C for 45 min in dark. Fura-2 labelled platelets were isolated, washed and finally  
641 resuspended in buffer B. Fluorescence for each sample was recorded in 400 µl aliquots of  
642 platelet suspensions at 37 °C under non-stirring condition by Hitachi fluorescence  
643 spectrophotometer (model F-2500). Excitation wavelengths were 340 and 380 nm and emission  
644 wavelength was set at 510 nm. Changes in intracellular free calcium concentration, [Ca<sup>2+</sup>]<sub>i</sub>, was  
645 monitored from fluorescence ratio (340/380) using Intracellular Cation Measurement Program  
646 in FL Solutions software. F<sub>max</sub> was determined by lysing the cells with 40 µM digitonin in  
647 presence of saturating CaCl<sub>2</sub>. F<sub>min</sub> was determined by the addition of 2 mM EGTA. Intracellular



648 free calcium was calibrated according to the derivation of Gryniewicz *et al* (Gryniewicz et al.,  
649 1985).

### 650 **Study of leucocyte-platelet interaction**

651 Fresh human blood (20  $\mu$ l) was added to a cocktail containing 10  $\mu$ l each from APC-anti-  
652 CD41a (platelet-specific) and FITC-anti-CD14 (leukocyte-specific) antibodies and mixed gently.  
653 Samples were treated with either DAPT (40  $\mu$ M) or vehicle for 10 min, followed by incubation  
654 with either TRAP (2  $\mu$ M) or DLL-4 (15  $\mu$ g/ml) for 15 min at RT. RBCs were lysed with 800  $\mu$ l FACS  
655 lysis solution (1X, BD Biosciences) for 10 min at RT. Leucocyte-platelet interaction was analysed  
656 on a flow cytometer. Side scatter voltage was set at 350 with a threshold of 52 V and  
657 amorphous gates were drawn to encompass neutrophils and monocytes separate from noise. A  
658 dot plot of side scatter (SSC) versus log FITC-CD14 fluorescence was created in the CellQuest  
659 Pro software. Amorphous gates were drawn for monocyte (high fluorescence and low SSC) and  
660 neutrophil (low fluorescence and high SSC) populations. All fluorescence data were collected  
661 using 4-quadrant logarithmic amplification for 1000 events in either neutrophil or monocyte  
662 gate from each sample and analyzed using CellQuest Pro Software.

### 663 **Thromboelastography (TEG)**

664 Coagulation parameters in whole blood were studied by employing  
665 Thromboelastograph 5000 Hemostasis Analyzer System (Haemonetics) and TEG analytical  
666 software. Whole blood (1 ml) was incubated either with DAPT (20  $\mu$ M) or vehicle for 10 min at  
667 RT, followed by transfer to citrated kaolin tubes with proper mixing.  $\text{CaCl}_2$  (20  $\mu$ l) was added to  
668 340  $\mu$ l sample to initiate coagulation cascade. Mixture was placed in disposable TEG cups and

669 data were collected as per to manufacturer instructions until maximum amplitude was reached  
670 or 60 min had elapsed.

### 671 **Intravital imaging of thrombus formation in murine mesenteric arterioles**

672 Ferric chloride-induced mesenteric arteriolar thrombosis in mice was imaged by  
673 intravital microscopy as previously described (Kulkarni et al., 2019, Chaurasia et al., 2019) with  
674 minor modifications. The animal study was ethically approved by the Central Animal Ethical  
675 Committee of Institute of Medical Sciences, Banaras Hindu University (Approval No.  
676 Dean/2017/CAEC/83). All efforts were made to minimize the number of animals used, and their  
677 suffering. Mice (species: *Mus musculus*; strain: Swiss albino; sex: male and female; age: 4-5  
678 weeks old; weight: 8-10 g each) were anaesthetized with intraperitoneal injection of  
679 ketamine/xylazine cocktail (100 mg/kg ketamine and 10 mg/kg xylazine). Anti-GPIIb $\beta$  antibody  
680 (DyLight 488-labeled, 0.1  $\mu$ g/g body weight) diluted in 50  $\mu$ l sterile PBS was injected into retro-  
681 orbital plexus of mice in order to fluorescently label circulating platelets. Mesentery was  
682 exposed through a mid-line incision in abdomen and kept moist by superfusion with warm (37°  
683 C) sterile PBS. An epifluorescence inverted video microscope (Nikon model Eclipse Ti-E)  
684 equipped with monochrome CCD cooled camera was employed to image isolated mesenteric  
685 arterioles of diameter 100-150  $\mu$ m. The arteriole was injured by topically placing a Whatman  
686 filter paper saturated with ferric chloride (10%) solution for 3 min and thrombosis in the injured  
687 vessel was monitored in real time for 40 min or until occlusion. Movies were subsequently  
688 analyzed with Nikon image analysis software (NIS Elements) to determine (a) the time required  
689 for formation of first thrombus (>20  $\mu$ m in diameter), (b) time required for occlusion of the  
690 vessel i.e. time required after injury till stoppage of blood flow for 30 sec, and (c) thrombus

691 growth rate i.e. growth of a thrombus (>30  $\mu\text{m}$  diameter) followed over a period of 3 min. Fold  
692 increase was calculated by dividing diameter of thrombus at given time (n) by the diameter of  
693 the same thrombus at time (0). Time 0 was defined as the time point at which thrombus  
694 diameter first reached the size 30  $\mu\text{m}$  approximately.

#### 695 **Study of platelet thrombus formation on immobilized collagen matrix under arterial shear**

696 Platelet adhesion and thrombus growth on immobilized collagen matrix was quantified  
697 by using BioFlux (Fluxion Biosciences) microfluidics system as described previously (Sonkar et  
698 al., 2019). Wells of high-shear plates were coated with 50  $\mu\text{l}$  collagen (from 100  $\mu\text{g}/\text{ml}$  stock) at  
699 10  $\text{dynes}/\text{cm}^2$  for 30 sec and were left for 1 h at RT. Wells were blocked with 1% bovine serum  
700 albumin at 10  $\text{dynes}/\text{cm}^2$  for 15 min at RT. Platelets stained with Calcein green (2  $\mu\text{g}/\text{ml}$ ) were  
701 perfused over collagen at physiological arterial shear rate (1500  $\text{sec}^{-1}$ ) for 5 min. Adhesion of  
702 platelets and thrombus formation in a fixed field over time was recorded. Representative  
703 images from 5-10 different fields were captured and total area occupied by thrombi at 5 min in  
704 5 representative fields was analyzed using ImageJ software (National Institute of Health).

#### 705 **Quantitative Real-Time PCR:**

706 **RNA Extraction-** Platelets were isolated from human blood as described above. Precaution was  
707 taken to prevent leukocyte contamination. Cells were counted with Beckman Coulter Counter  
708 Multisizer 4. Total RNA extraction, reverse transcription and qRT-PCR were carried out as  
709 described (Kumari et al., 2015). Total RNA was extracted from platelets using TRIzol reagent  
710 according to the protocol of the manufacturer and suspended in DEPC-treated water.

711 **Reverse Transcription-** Platelet RNA (1 µg) was transcribed to cDNA using a high-capacity cDNA  
712 reverse transcription kit (Applied Biosystems) according to the instructions of the  
713 manufacturer. Samples were amplified in a PTC-150 thermal cycler (MJ Research) by using the  
714 following program: 25 °C for 10 min, 37 °C for 2 h, and 85 °C for 5 min.

715 **Quantitative Real-Time PCR-** Primers were designed using the latest version of Primer3 input  
716 software. The primers for target genes were as presented in Table 1. Glyceraldehyde 3-  
717 phosphate dehydrogenase (GAPDH) and β-actin were used as the reference genes. We  
718 performed real-time PCR employing SYBR Green SuperMix in a CFX-96 real-time PCR system  
719 (Bio-Rad). Thermal cycling conditions were as follows: 95 °C for 3 min, followed by 40 cycles  
720 consisting of 10 s of denaturation at 95 °C, 10 s of annealing (at temperatures mentioned in the  
721 Table 1), and extension at 72 °C. A melt peak analysis of amplicons was carried out to rule out  
722 nonspecific amplifications.

| Genes   | Forward (5' to 3')   | Reverse (5' to 3')     | Size (bp) | Annealing Temp (°C) |
|---------|----------------------|------------------------|-----------|---------------------|
| GAPDH   | GAAGGTGAAGGTCGGAGTC  | GAAGATGGTGATGGGATTTTC  | 226       | 57                  |
| β-actin | AAATCTGGCACCACACCTTC | AGCACAGCCTGGATAGCAAC   | 160       | 59                  |
| Notch1  | TCAGCGGGATCCACTGTGAG | ACACAGGCAGGTGAACGAGTTG | 104       | 62                  |

|         |                          |                          |     |    |
|---------|--------------------------|--------------------------|-----|----|
| Notch2  | TGCCAAGCTCAGTGGTGTGTA    | TGCTAGGCTTTGTGGGATTCAG   | 132 | 60 |
| Notch3  | GGTCCCAGTGAGCACCTTAC     | GTGGATTCCGACCAGTCTGAGAG  | 100 | 60 |
| Notch4  | CGGCCTCGGACTCAGTCA       | CAACTCCATCCTCATCAACTTCTG | 112 | 60 |
| DLL1    | TGTGTGACGAACACTACTACGGAG | GTGAAGTGGCCGAAGGCA       | 76  | 65 |
| DLL3    | GAGACACCCAGGTCCTTTGA     | CAGTGGCAGATGTAGGCAGA     | 61  | 65 |
| DLL4    | CCAGGAAAGTTTCCCCACAGT    | CCGACACTCTGGCTTTTCACT    | 82  | 65 |
| Jagged1 | GCTGGCAAGGCCTGTACTG      | ACTGCCAGGGCTCATTACAGA    | 78  | 65 |
| Jagged2 | CACCGAGGTCAAGGTGGAGA     | ACGCTGAAGGCACACACA       | 84  | 65 |

723 Table 1. Details of primers employed in amplification reactions

724 **Statistical Methods:**

725 Standard statistical methods were employed in the study. Two tailed Student's *t* test  
726 (paired or unpaired) (for two groups) or RM one-way analysis of variance (ANOVA) (for more  
727 than two groups) with either Dunnett's or Sidak's multiple comparisons test was used for  
728 evaluation. Tests were considered significant at  $p < 0.05$ . All the analysis was carried out  
729 employing GraphPad Prism version 8.4. Linear regression analysis was performed for *in vivo*

730 studies, and the slopes from best-fit were used to arrive at rates in time-lapse experiments.  
731 Kalpan-Meier analysis and Log-Rank test were performed to determine significance of  
732 difference in time to occlusion of vessel between different groups. Data are presented as mean  
733  $\pm$  SEM of at least three individual experiments.

#### 734 **Acknowledgements**

735 This research was supported by J. C. Bose National Fellowship and grants received by D. Dash  
736 from the Indian Council of Medical Research (ICMR) under CAR, Department of Biotechnology  
737 (DBT) and Science and Engineering Research Board (SERB), Government of India. S.N. Chaurasia  
738 is a recipient of financial assistance from the ICMR. M. Ekhlak is a recipient of CSIR-SRF and V.  
739 Singh is a recipient of UGC-SRF. D. Dash acknowledges assistance from the Humboldt  
740 Foundation, Germany.

#### 741 **Author contributions**

742 S.N.C., M.E., G.K., and V.S. performed human experiments and analysed the data. R.L.M  
743 performed real-time PCR and analysed the data. G.K. performed nanoparticle tracking analysis  
744 and analysed the data. S.N.C., V.S., and R.L.M. performed Western analysis and analysed the  
745 data. S.N.C. and M.E. performed animal experiment and analysed the data. D.D. and S.N.C.  
746 designed the research and wrote the manuscript. D.D. conceived the study and supervised the  
747 entire research work.

#### 748 **Competing Interests**

749 The authors have no conflicting financial interests.

750 **Data and Materials availability**

751 All the data are available in the main text or the supporting information or source data file.  
752 Source Data file have been provided for each figure included either in the manuscript or  
753 supplemental data. All the materials used in the study are commercially available.

754 **References**

- 755 ANDERSSON, E. R., SANDBERG, R. & LENDAHL, U. 2011. Notch signaling: simplicity in design,  
756 versatility in function. *Development*, 138, 3593-612.
- 757 ATKINSON, B. T., STAFFORD, M. J., PEARS, C. J. & WATSON, S. P. 2001. Signalling events  
758 underlying platelet aggregation induced by the glycoprotein VI agonist convulxin. *Eur J*  
759 *Biochem*, 268, 5242-8.
- 760 BLANPAIN, C., LOWRY, W. E., PASOLLI, H. A. & FUCHS, E. 2006. Canonical notch signaling  
761 functions as a commitment switch in the epidermal lineage. *Genes Dev*, 20, 3022-35.
- 762 BUSH, A. I., MARTINS, R. N., RUMBLE, B., MOIR, R., FULLER, S., MILWARD, E., CURRIE, J., AMES,  
763 D., WEIDEMANN, A., FISCHER, P. & ET AL. 1990. The amyloid precursor protein of  
764 Alzheimer's disease is released by human platelets. *J Biol Chem*, 265, 15977-83.
- 765 CANOBBIO, I., GUIDETTI, G. F., OLIVIERO, B., MANGANARO, D., VARA, D., TORTI, M. & PULA, G.  
766 2014. Amyloid beta-peptide-dependent activation of human platelets: essential role for  
767 Ca<sup>2+</sup> and ADP in aggregation and thrombus formation. *Biochem J*, 462, 513-23.
- 768 CERLETTI, C., TAMBURRELLI, C., IZZI, B., GIANFAGNA, F. & DE GAETANO, G. 2012. Platelet-  
769 leukocyte interactions in thrombosis. *Thromb Res*, 129, 263-6.

- 770 CHAURASIA, S. N., KUSHWAHA, G., KULKARNI, P. P., MALLICK, R. L., LATHEEF, N. A., MISHRA, J.  
771 K. & DASH, D. 2019. Platelet HIF-2 $\alpha$  promotes thrombogenicity through PAI-1 synthesis  
772 and extracellular vesicle release. *Haematologica*, 104, 2482-2492.
- 773 DAVIES, T. A., BILLINGSLEA, A., JOHNSON, R., GREENBERG, S., ORTIZ, M., LONG, H., SGRO, K.,  
774 TIBBLES, H., SEETOO, K., RATHBUN, W., SCHONHORN, J. & SIMONS, E. R. 1997. Stimulus  
775 responses and amyloid precursor protein processing in DAMI megakaryocytes. *J Lab Clin*  
776 *Med*, 130, 21-32.
- 777 DORSCH, M., ZHENG, G., YOWE, D., RAO, P., WANG, Y., SHEN, Q., MURPHY, C., XIONG, X., SHI,  
778 Q., GUTIERREZ-RAMOS, J. C., FRASER, C. & VILLEVAL, J. L. 2002. Ectopic expression of  
779 Delta4 impairs hematopoietic development and leads to lymphoproliferative disease.  
780 *Blood*, 100, 2046-55.
- 781 FREEDMAN, J. E. 2011. A platelet transcriptome revolution. *Blood*, 118, 3760-1.
- 782 GOLDEN, A., BRUGGE, J. S. & SHATTIL, S. J. 1990. Role of platelet membrane glycoprotein IIb-IIIa  
783 in agonist-induced tyrosine phosphorylation of platelet proteins. *J Cell Biol*, 111, 3117-  
784 27.
- 785 GRYNKIEWICZ, G., POENIE, M. & TSIEN, R. Y. 1985. A new generation of Ca<sup>2+</sup> indicators with  
786 greatly improved fluorescence properties. *J Biol Chem*, 260, 3440-50.
- 787 GURUHARSHA, K. G., KANKEL, M. W. & ARTAVANIS-TSAKONAS, S. 2012. The Notch signalling  
788 system: recent insights into the complexity of a conserved pathway. *Nat Rev Genet*, 13,  
789 654-66.
- 790 HEIJNEN, H. F., SCHIEL, A. E., FIJNHEER, R., GEUZE, H. J. & SIXMA, J. J. 1999. Activated platelets  
791 release two types of membrane vesicles: microvesicles by surface shedding and



- 792 exosomes derived from exocytosis of multivesicular bodies and alpha-granules. *Blood*,  
793 94, 3791-9.
- 794 HIRSCH, E., BOSCO, O., TROPEL, P., LAFFARGUE, M., CALVEZ, R., ALTRUDA, F., WYMANN, M. &  
795 MONTRUCCHIO, G. 2001. Resistance to thromboembolism in PI3Kgamma-deficient  
796 mice. *Faseb j*, 15, 2019-21.
- 797 ISO, T., HAMAMORI, Y. & KEDES, L. 2003. Notch signaling in vascular development. *Arterioscler*  
798 *Thromb Vasc Biol*, 23, 543-53.
- 799 KOPAN, R. & ILAGAN, M. X. 2009. The canonical Notch signaling pathway: unfolding the  
800 activation mechanism. *Cell*, 137, 216-33.
- 801 KULKARNI, P. P., TIWARI, A., SINGH, N., GAUTAM, D., SONKAR, V. K., AGARWAL, V. & DASH, D.  
802 2019. Aerobic glycolysis fuels platelet activation: small-molecule modulators of platelet  
803 metabolism as anti-thrombotic agents. *Haematologica*, 104, 806-818.
- 804 KUMARI, S., CHAURASIA, S. N., KUMAR, K. & DASH, D. 2014. Anti-apoptotic role of sonic  
805 hedgehog on blood platelets. *Thromb Res*, 134, 1311-5.
- 806 KUMARI, S., CHAURASIA, S. N., NAYAK, M. K., MALLICK, R. L. & DASH, D. 2015. Sirtuin Inhibition  
807 Induces Apoptosis-like Changes in Platelets and Thrombocytopenia. *J Biol Chem*, 290,  
808 12290-9.
- 809 KUMARI, S. & DASH, D. 2013. Regulation of  $\beta$ -catenin stabilization in human platelets.  
810 *Biochimie*, 95, 1252-7.
- 811 KUSHWAHA, G., CHAURASIA, S. N., PANDEY, A. & DASH, D. 2018. Characterization of fibrinogen  
812 binding on platelet-derived extracellular vesicles. *Thromb Res*, 172, 135-138.

- 813 LI, Q. X., FULLER, S. J., BEYREUTHER, K. & MASTERS, C. L. 1999. The amyloid precursor protein of  
814 Alzheimer disease in human brain and blood. *J Leukoc Biol*, 66, 567-74.
- 815 MAILLARD, I., ADLER, S. H. & PEAR, W. S. 2003. Notch and the immune system. *Immunity*, 19,  
816 781-91.
- 817 MALLICK, R. L., KUMARI, S., SINGH, N., SONKAR, V. K. & DASH, D. 2015. Prion protein fragment  
818 (106-126) induces prothrombotic state by raising platelet intracellular calcium and  
819 microparticle release. *Cell Calcium*, 57, 300-11.
- 820 MCREDMOND, J. P., PARK, S. D., REILLY, D. F., COPPINGER, J. A., MAGUIRE, P. B., SHIELDS, D. C.  
821 & FITZGERALD, D. J. 2004. Integration of proteomics and genomics in platelets: a profile  
822 of platelet proteins and platelet-specific genes. *Mol Cell Proteomics*, 3, 133-44.
- 823 MERCHER, T., CORNEJO, M. G., SEARS, C., KINDLER, T., MOORE, S. A., MAILLARD, I., PEAR, W. S.,  
824 ASTER, J. C. & GILLILAND, D. G. 2008. Notch signaling specifies megakaryocyte  
825 development from hematopoietic stem cells. *Cell Stem Cell*, 3, 314-26.
- 826 MIELE, L. & OSBORNE, B. 1999. Arbiter of differentiation and death: Notch signaling meets  
827 apoptosis. *J Cell Physiol*, 181, 393-409.
- 828 ORTIZ-MUÑOZ, G., MALLAVIA, B., BINS, A., HEADLEY, M., KRUMMEL, M. F. & LOONEY, M. R.  
829 2014. Aspirin-triggered 15-epi-lipoxin A4 regulates neutrophil-platelet aggregation and  
830 attenuates acute lung injury in mice. *Blood*, 124, 2625-34.
- 831 POIRAUT-CHASSAC, S., SIX, E., CATELAIN, C., LAVERGNE, M., VILLEVAL, J. L., VAINCHENKER, W.  
832 & LAURET, E. 2010. Notch/Delta4 signaling inhibits human megakaryocytic terminal  
833 differentiation. *Blood*, 116, 5670-8.

- 834 POLANOWSKA-GRABOWSKA, R. & GEAR, A. R. 1999. Activation of protein kinase C is required  
835 for the stable attachment of adherent platelets to collagen but is not needed for the  
836 initial rapid adhesion under flow conditions. *Arterioscler Thromb Vasc Biol*, 19, 3044-54.
- 837 QIAO, L. & WONG, B. C. 2009. Role of Notch signaling in colorectal cancer. *Carcinogenesis*, 30,  
838 1979-86.
- 839 SHEN, M. Y., HSIAO, G., FONG, T. H., CHEN, H. M., CHOU, D. S., LIN, C. H., SHEU, J. R. & HSU, C.  
840 Y. 2008. Amyloid beta peptide-activated signal pathways in human platelets. *Eur J*  
841 *Pharmacol*, 588, 259-66.
- 842 SINAURIDZE, E. I., KIREEV, D. A., POPENKO, N. Y., PICHUGIN, A. V., PANTELEEV, M. A.,  
843 KRYMSKAYA, O. V. & ATAULLAKHANOV, F. I. 2007. Platelet microparticle membranes  
844 have 50- to 100-fold higher specific procoagulant activity than activated platelets.  
845 *Thromb Haemost*, 97, 425-34.
- 846 SKOVRONSKY, D. M., LEE, V. M. & PRATICO, D. 2001. Amyloid precursor protein and amyloid  
847 beta peptide in human platelets. Role of cyclooxygenase and protein kinase C. *J Biol*  
848 *Chem*, 276, 17036-43.
- 849 SMITH, C. C. 1997. Stimulated release of the beta-amyloid protein of Alzheimer's disease by  
850 normal human platelets. *Neurosci Lett*, 235, 157-9.
- 851 SMITH, R. P. & BROZE, G. J., JR. 1992. Characterization of platelet-releasable forms of beta-  
852 amyloid precursor proteins: the effect of thrombin. *Blood*, 80, 2252-60.
- 853 SONKAR, V. K., KULKARNI, P. P. & DASH, D. 2014. Amyloid beta peptide stimulates platelet  
854 activation through RhoA-dependent modulation of actomyosin organization. *Faseb j*, 28,  
855 1819-29.

- 856 SONKAR, V. K., KUMAR, R., JENSEN, M., WAGNER, B. A., SHARATHKUMAR, A. A., MILLER, F. J.,  
857 JR., FASANO, M., LENTZ, S. R., BUETTNER, G. R. & DAYAL, S. 2019. Nox2 NADPH oxidase  
858 is dispensable for platelet activation or arterial thrombosis in mice. *Blood Adv*, 3, 1272-  
859 1284.
- 860 SPINELLI, S. L., MAGGIRWAR, S. B., BLUMBERG, N. & PHIPPS, R. P. 2010. Nuclear emancipation:  
861 a platelet tour de force. *Sci Signal*, 3, pe37.
- 862 STEELE, B. M., HARPER, M. T., MACAULAY, I. C., MORRELL, C. N., PEREZ-TAMAYO, A., FOY, M.,  
863 HABAS, R., POOLE, A. W., FITZGERALD, D. J. & MAGUIRE, P. B. 2009. Canonical Wnt  
864 signaling negatively regulates platelet function. *Proceedings of the National Academy of*  
865 *Sciences of the United States of America*, 106, 19836-19841.
- 866 SUGIMOTO, A., YAMAMOTO, M., SUZUKI, M., INOUE, T., NAKAMURA, S., MOTODA, R.,  
867 YAMASAKI, F. & ORITA, K. 2006. Delta-4 Notch ligand promotes erythroid differentiation  
868 of human umbilical cord blood CD34+ cells. *Exp Hematol*, 34, 424-32.
- 869 TARASSISHIN, L., YIN, Y. I., BASSIT, B. & LI, Y. M. 2004. Processing of Notch and amyloid  
870 precursor protein by gamma-secretase is spatially distinct. *Proc Natl Acad Sci U S A*, 101,  
871 17050-5.
- 872 VAN TETERING, G., BOVENSCHEN, N., MEELDIJK, J., VAN DIEST, P. J. & VOOIJS, M. 2011.  
873 Cleavage of Notch1 by granzyme B disables its transcriptional activity. *Biochem J*, 437,  
874 313-22.
- 875 WADHAWAN, V., KARIM, Z. A., MUKHOPADHYAY, S., GUPTA, R., DIKSHIT, M. & DASH, D. 2004.  
876 Platelet storage under in vitro condition is associated with calcium-dependent

- 877           apoptosis-like lesions and novel reorganization in platelet cytoskeleton. *Arch Biochem*
- 878           *Biophys*, 422, 183-90.
- 879   WATSON, S. P. & HAMBLETON, S. 1989. Phosphorylation-dependent and -independent
- 880           pathways of platelet aggregation. *Biochem J*, 258, 479-85.
- 881
